# Supplementary material
Source: PubMed Central journal article supplement (PMC7755246)
Supplement: AEM.01459-20-s0001.pdf [file AEM.01459-20-s0001.pdf]

**Supplemental Materials for “Amino Sugars Reshape Interactions  
between *Streptococcus mutans* and *Streptococcus gordonii*”**

Lulu Chen<sup>a, b</sup>, Alejandro R. Walker<sup>a</sup>, Robert A. Burne<sup>a</sup> and Lin Zeng<sup>a#</sup>

<sup>a</sup> Department of Oral Biology, University of Florida, College of Dentistry, Gainesville,  
Florida, USA.

<sup>b</sup> Department of Pediatric Dentistry, Beijing Stomatological Hospital, Capital Medical  
University, Beijing 100050, China.

**Includes Figures S1 to S8 and Table S1 to S8.**

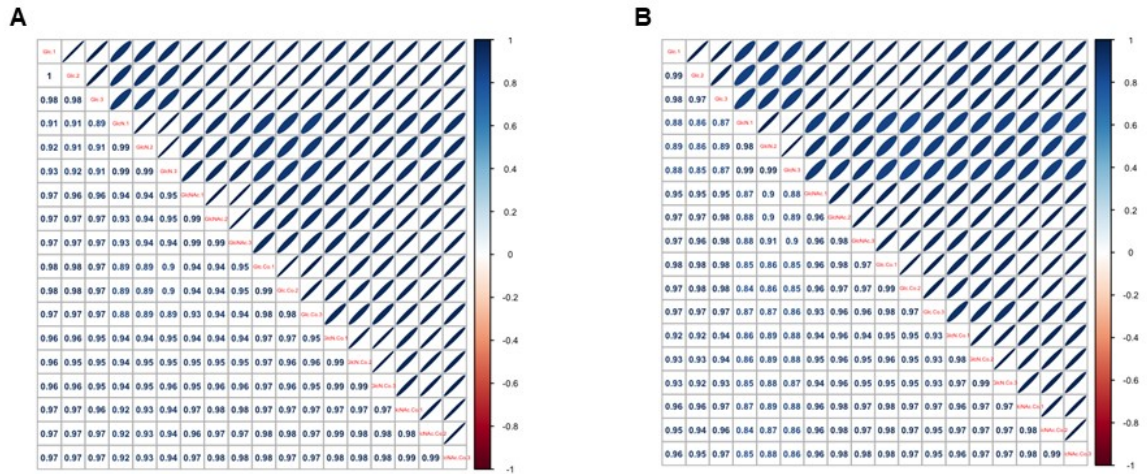

**Fig S1.** Matrices of correlations across 18 samples from *S. mutans* (A) and *S. gordonii* (B). Plots show scatter-point ellipses (upper-diagonal) and correlation values (lower-diagonal).

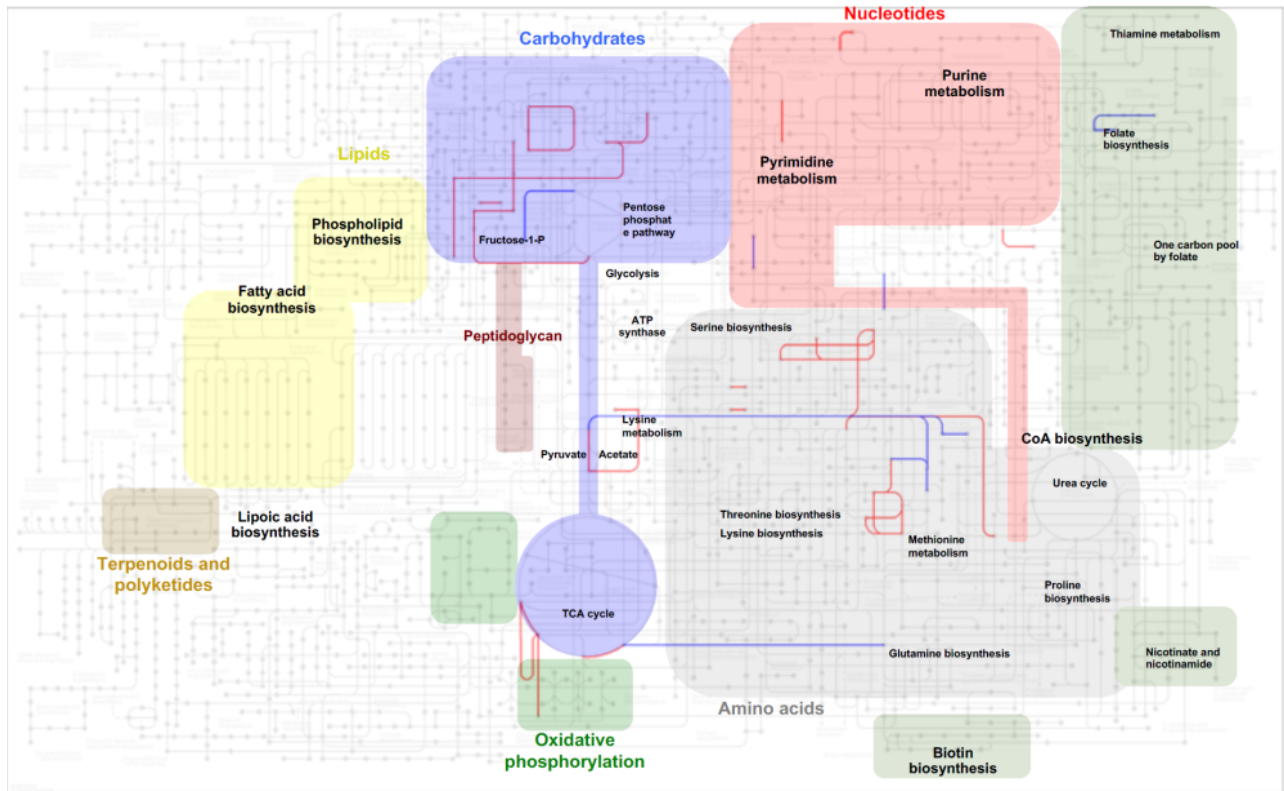

■ single-species *S. mutans* on GlcN

**Fig. S2.** KEGG visualized map of metabolic pathways showing significant change in gene expression in GlcN-supported, single-species *S. mutans* cultures as compared to glucose-supported cultures. Red lines indicate genes and pathways with increased expression, blue lines denote those with decreased expression.

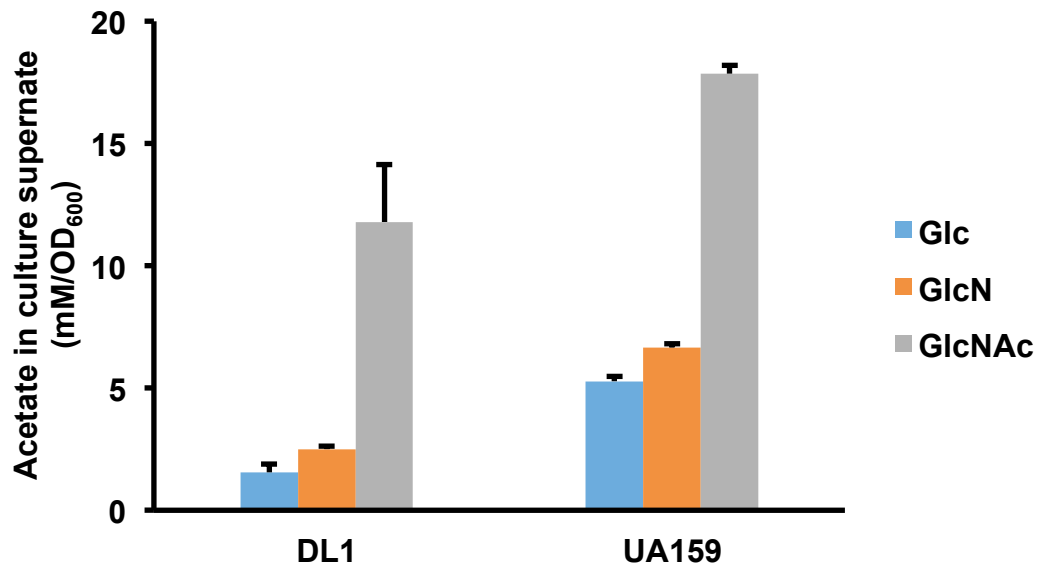

**Fig. S3.** Measurements of acetate in cultures of UA159 and DL1 on various carbohydrates. Overnight cultures in BHI of each bacterium ( $n = 3$ ) were diluted 1:20 into TV medium supplemented with 20 mM of Glc, GlcN or GlcNAc and incubated in an aerobic environment maintained with 5% of CO<sub>2</sub>. Cultures from the exponential phase were spun down and supernates removed for measurement of acetate, using an acetate colorimetric assay kit (Sigma). Each sample was measured twice, and the TV base medium was used as a blank. The results were normalized against cell density (OD<sub>600</sub>) at time of harvest.

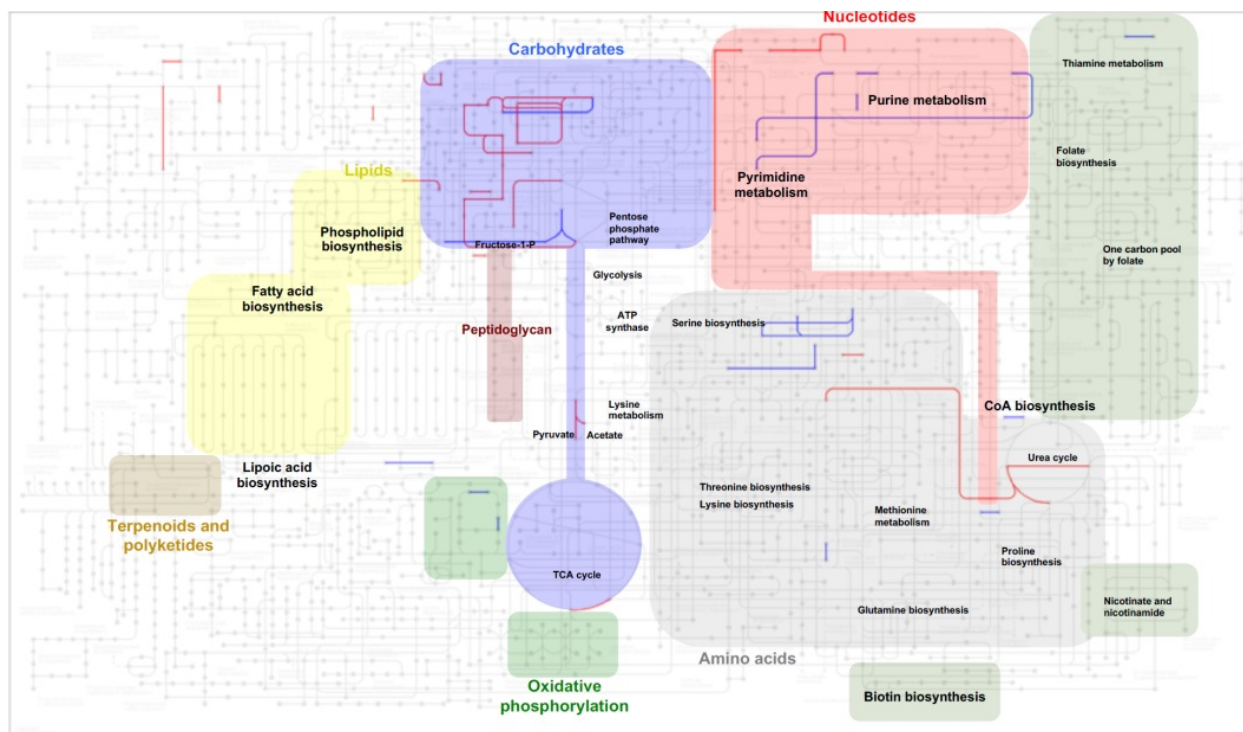

■ single-species *S. gordonii* on GlcN

**Fig. S4.** KEGG visualized map of metabolic pathways showing significant change in gene expression in GlcN-supported, single-species *S. gordonii* cultures as compared to glucose-supported cultures. Red lines indicate genes and pathways with increased expression, blue lines denote those with decreased expression.

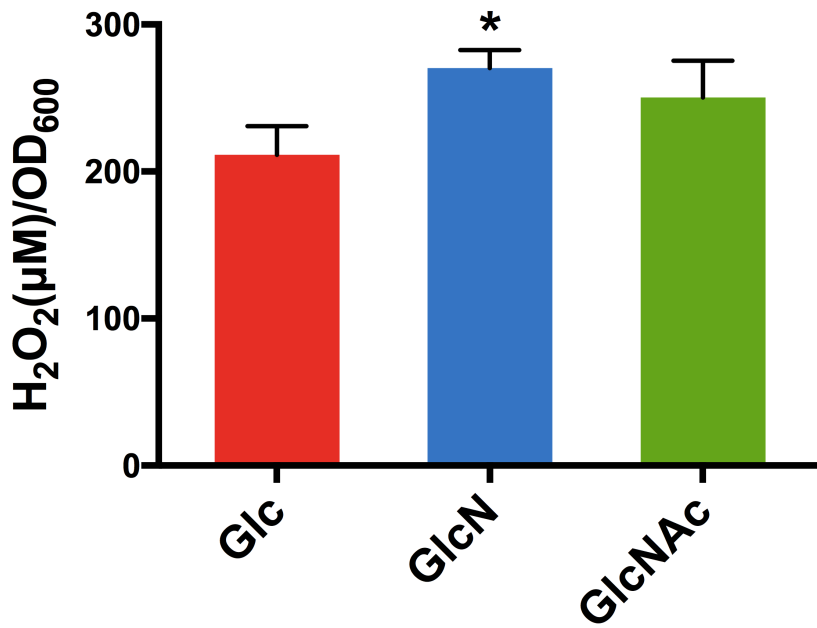

**Fig. S5.** Measurements of H<sub>2</sub>O<sub>2</sub> in liquid cultures of *S. gordonii* DL1 prepared with TV supplemented with 20 mM of specified carbohydrates (1). Each condition was represented by three biological repeats, and each sample measured at least twice. The results were normalized against optical density (OD<sub>600</sub>) of the culture. The asterisk denotes significant difference relative to the Glc condition according to Students' *t*-test ( $p < 0.05$ ).

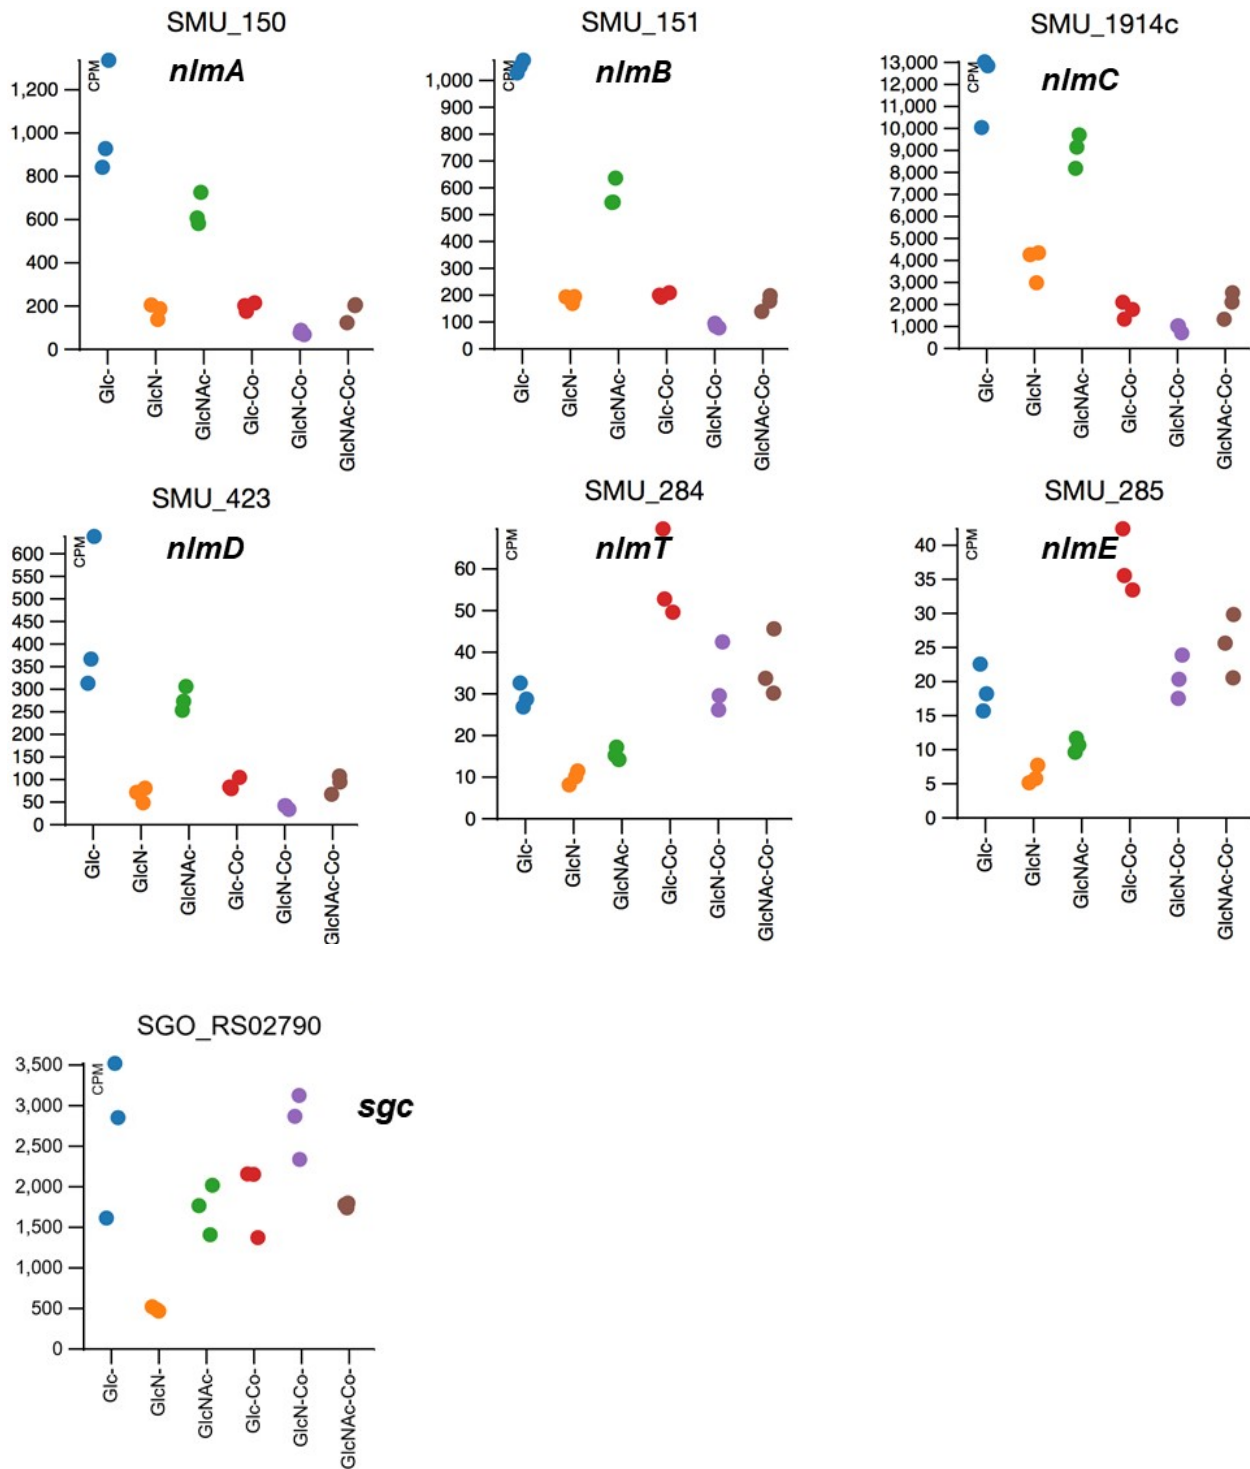

**Fig. S6.** mRNA levels of genes involved in mutacin production in both bacteria. The results were derived from RNA-Seq analysis using the website <http://degust.erc.monash.edu/> and presented in counts per million (CPM). “Co.” denotes mixed-species co-cultures.

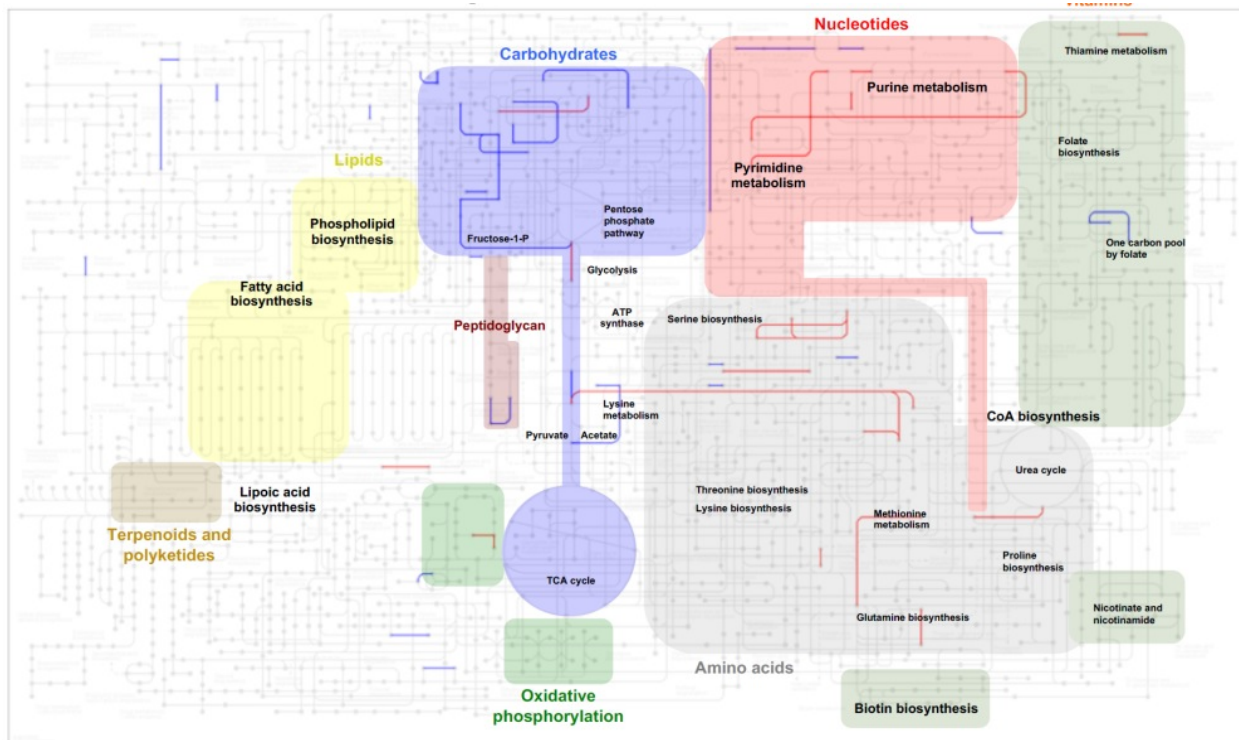

## ■ dual-species *S. gordonii* on GlcN

**Fig. S7.** KEGG visualized map of metabolic pathways showing significant changes in *S. gordonii* gene expression in GlcN-supported, mixed-species cultures together with *S. mutans* as compared to *S. gordonii* grown alone on GlcN. Red lines indicate genes and pathways with increased expression, blue lines denote those with decreased expression.



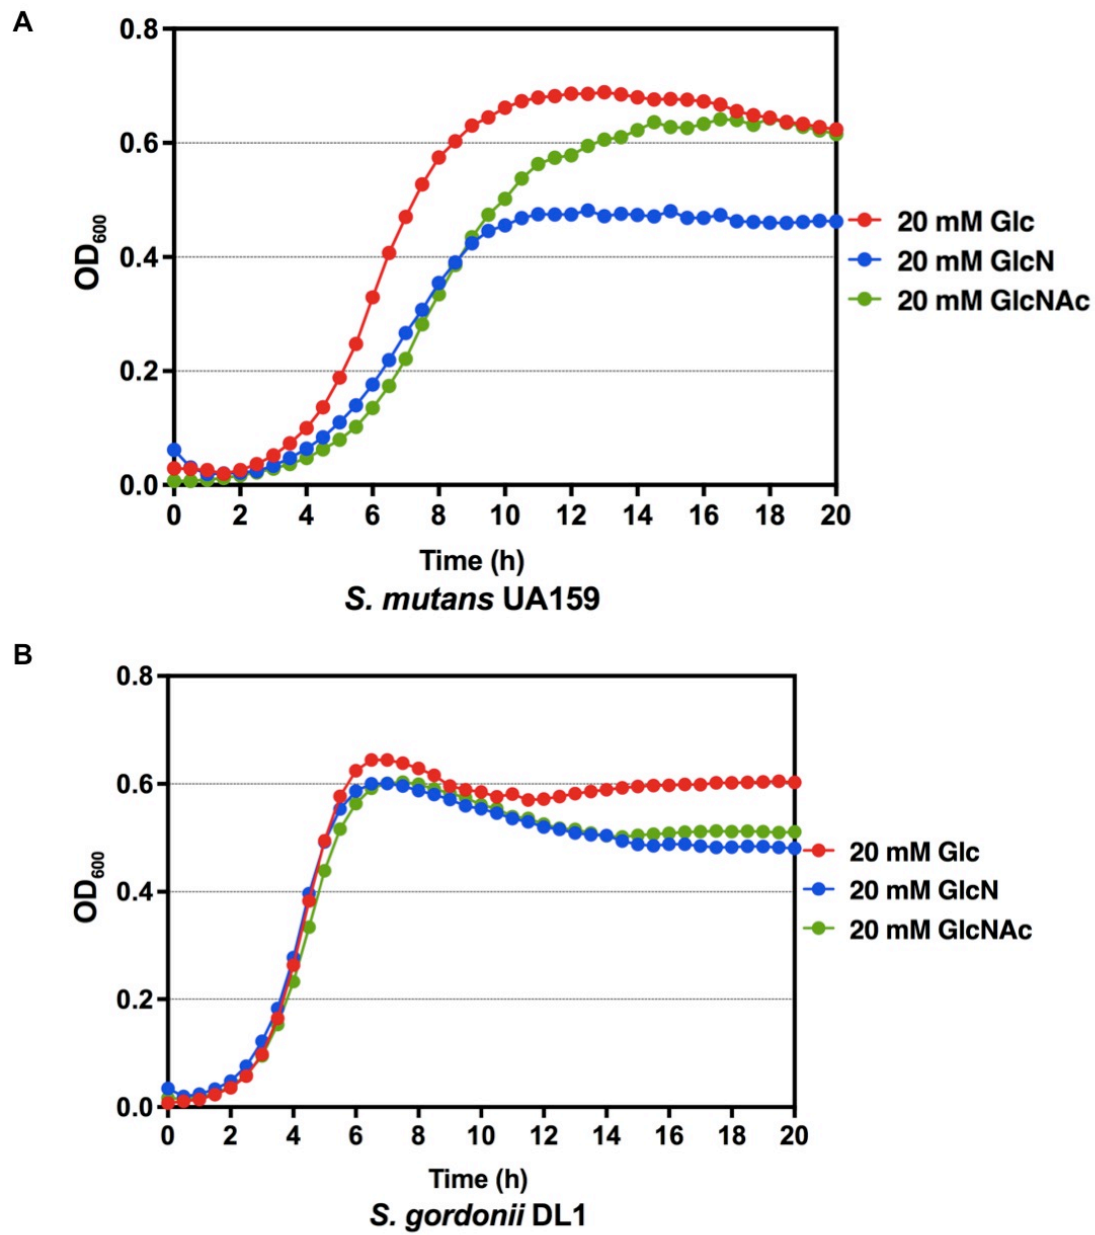

**Fig. S8.** Growth curves of UA159 (A) and DL1 (B) on TV media supplemented with 20 mM of Glc, GlcN or GlcNAc. The samples were covered with mineral oil and monitored at 37°C using a Bioscreen C system.

**Table S1.** Differentially expressed genes (DEG) in *S. mutans* grown on GlcN compared to glucose. SMU# in red denotes up-regulation, and SMU# in blue denotes down-regulation.

| SMU#          | Gene name        | Gene function                                                           |
|---------------|------------------|-------------------------------------------------------------------------|
| GlcN_Up (114) |                  |                                                                         |
| SMU_1088      | <i>apbE</i>      | thiamine biosynthesis lipoprotein                                       |
| SMU_1089      |                  | conserved hypothetical protein                                          |
| SMU_1090      |                  | conserved hypothetical protein                                          |
| SMU_1116c     |                  | hypothetical protein                                                    |
| SMU_1117      | <i>nox</i>       | H <sub>2</sub> O-forming NADH oxidase                                   |
| SMU_113       | <i>pfk</i>       | fructose-1-phosphate kinase                                             |
| SMU_114       | <i>fruC</i>      | PTS system, fructose-specific IIBC component                            |
| SMU_1147c     |                  | involved in competence                                                  |
| SMU_115       | <i>fruD</i>      | PTS system, fructose-specific IIA component                             |
| SMU_1151c     |                  | conserved hypothetical protein                                          |
| SMU_1152c     |                  | conserved hypothetical protein                                          |
| SMU_1153c     |                  | conserved hypothetical protein                                          |
| SMU_1154c     |                  | conserved hypothetical protein                                          |
| SMU_1156c     |                  | hypothetical protein                                                    |
| SMU_1157c     |                  | conserved hypothetical protein                                          |
| SMU_1158c     |                  | conserved hypothetical protein                                          |
| SMU_1159c     |                  | hypothetical protein                                                    |
| SMU_116       | <i>lacD1</i>     | tagatose 1,6-aldolase                                                   |
| SMU_1160c     |                  | hypothetical protein                                                    |
| SMU_1287      | <i>pmrA tnrA</i> | transcriptional regulator                                               |
| SMU_1360c     |                  | hypothetical protein                                                    |
| SMU_1361c     | <i>yjjB</i>      | transcriptional regulator                                               |
| SMU_1421      | <i>acoC yugF</i> | dihydrolipoamide acetyltransferase (acetoin dehydrogenase E2 component) |
| SMU_1422      | <i>acoB</i>      | acetoin dehydrogenase E1 component                                      |
| SMU_1423      | <i>acoA</i>      | acetoin dehydrogenase E1 component                                      |
| SMU_1424      | <i>acoL adhD</i> | dihydrolipoamide dehydrogenase                                          |
| SMU_148       | <i>adhE</i>      | alcohol-acetaldehyde dehydrogenase                                      |
| SMU_149       | <i>tpn</i>       | transposase fragment (IS605/IS200-like)                                 |
| SMU_1490      | <i>lacG</i>      | phospho-beta-D-galactosidase                                            |
| SMU_1491      | <i>lacE</i>      | PTS system, lactose-specific component IIBC                             |
| SMU_1493      | <i>lacD</i>      | tagatose-1,6-bisphosphate aldolase                                      |
| SMU_1535      | <i>glgP</i>      | glycogen phosphorylase                                                  |
| SMU_1536      | <i>glgA</i>      | glycogen synthase                                                       |
| SMU_1537      | <i>glgD</i>      | glycogen biosynthesis protein                                           |
| SMU_1538      | <i>glgC</i>      | glucose-1-phosphate adenylyltransferase                                 |

---

|           |                  |                                                                                                               |
|-----------|------------------|---------------------------------------------------------------------------------------------------------------|
| SMU_1539  | <i>glgB</i>      | 1,4-alpha-glucan branching enzyme                                                                             |
| SMU_1596  | <i>celD</i>      | PTS system, cellobiose-specific IIC component                                                                 |
| SMU_1597c | <i>celX</i>      | conserved hypothetical protein                                                                                |
| SMU_1598  | <i>celC licA</i> | PTS system IIA component, required for cellobiose uptake and metabolism                                       |
| SMU_1599  | <i>celR licR</i> | transcriptional regulator, required for cellobiose uptake and metabolism                                      |
| SMU_1600  | <i>celB licB</i> | PTS system IIB component, required for cellobiose uptake and metabolism                                       |
| SMU_1692  | <i>pflA pflC</i> | pyruvate-formate lyase activating enzyme                                                                      |
| SMU_1770  | <i>syv valS</i>  | valyl-tRNA synthetase                                                                                         |
| SMU_1772c |                  | hypothetical protein                                                                                          |
| SMU_179   |                  | conserved hypothetical protein (possible oxidoreductase)                                                      |
| SMU_180   |                  | oxidoreductase, possible fumarate reductase                                                                   |
| SMU_1841  | <i>scrA</i>      | PTS system, sucrose-specific IIABC component                                                                  |
| SMU_1843  | <i>scrB</i>      | sucrose-6-phosphate hydrolase                                                                                 |
| SMU_1844  | <i>scrR</i>      | sucrose operon repressor                                                                                      |
| SMU_1861c |                  | hypothetical protein                                                                                          |
| SMU_1956c | <i>levX</i>      | conserved hypothetical protein                                                                                |
| SMU_1957  | <i>levG ptnD</i> | fructose-specific Enzyme IID component                                                                        |
| SMU_1958c | <i>levF</i>      | fructose-specific Enzyme IIC component                                                                        |
| SMU_1960c | <i>levE</i>      | fructose-specific Enzyme IIB component                                                                        |
| SMU_1961c | <i>levD ptfA</i> | fructose-specific Enzyme IIA component                                                                        |
| SMU_2027  |                  | transcriptional regulator/repressor                                                                           |
| SMU_2037  | <i>dexS treA</i> | trehalose-6-phosphate hydrolase                                                                               |
| SMU_2038  | <i>pttB treB</i> | phosphotransferase system, trehalose-specific IIBC component (EIIBC-tre)                                      |
| SMU_2127  | <i>gabD</i>      | succinic semialdehyde dehydrogenase (NAD-dependent aldehyde dehydrogenase)                                    |
| SMU_252   |                  | hypothetical protein                                                                                          |
| SMU_270   | <i>rmpC sgaT</i> | ribulose monophosphate PTS pathway enzyme IIC                                                                 |
| SMU_402   | <i>pfl</i>       | pyruvate formate-lyase                                                                                        |
| SMU_404c  |                  | hypothetical protein                                                                                          |
| SMU_43    |                  | conserved hypothetical protein (possible site-specific DNA-methyltransferase/restriction modification enzyme) |
| SMU_44    |                  | conserved hypothetical protein                                                                                |
| SMU_45    |                  | hypothetical protein                                                                                          |
| SMU_46    |                  | hypothetical protein                                                                                          |
| SMU_47    |                  | hypothetical protein                                                                                          |
| SMU_51    | <i>purK</i>      | phosphoribosylaminoimidazole carboxylase, ATPase subunit                                                      |
| SMU_574c  | <i>lrgB</i>      | effector of murein hydrolase                                                                                  |
| SMU_575c  | <i>lrgA</i>      | murein hydrolase regulator                                                                                    |
| SMU_576   | <i>lytT</i>      | response regulator                                                                                            |

---

---

|          |                  |                                                                                              |
|----------|------------------|----------------------------------------------------------------------------------------------|
| SMU_577  | <i>lytS</i>      | sensor histidine kinase                                                                      |
| SMU_642  |                  | hypothetical protein                                                                         |
| SMU_643  | <i>yeeB</i>      | acetyl esterase/ sugar hydrolase                                                             |
| SMU_791c |                  | hypothetical protein                                                                         |
| SMU_798c |                  | hypothetical protein                                                                         |
| SMU_799c |                  | conserved hypothetical protein                                                               |
| SMU_870  | <i>fruR</i>      | lactose phosphotransferase system repressor/transcriptional repressor of the fructose operon |
| SMU_871  | <i>fruK</i>      | fructose-1-phosphate kinase                                                                  |
| SMU_872  | <i>fruI</i>      | fructose-specific PTS system enzyme IIBC component                                           |
| SMU_882  | <i>msmK</i>      | multiple sugar-binding transport ATP-binding protein MsmK                                    |
| SMU_883  | <i>dexB</i>      | glucan 1,6-alpha-glucosidase                                                                 |
| SMU_940c | <i>patB</i>      | hemolysin III-related protein                                                                |
| SMU_941c |                  | conserved hypothetical protein                                                               |
| SMU_956  | <i>clpE clpL</i> | ATP-dependent Clp protease, ATP-binding subunit                                              |
| SMU_980  | <i>bglP ptbA</i> | beta-glucoside-specific EII permease                                                         |
| SMU_981  | <i>bglB</i>      | beta-glucosidase, BglB protein                                                               |
| SMU_982  | <i>bglB</i>      | beta-glucosidase, BglB protein                                                               |
| SMU_1425 | <i>clpB</i>      | ATP-dependent Clp protease, ATP-binding subunit ClpB                                         |
| SMU_1492 | <i>lacF</i>      | PTS system, lactose-specific IIA component                                                   |
| SMU_1494 | <i>lacC</i>      | tagatose-6-phosphate kinase                                                                  |
| SMU_1495 | <i>lacB rpiB</i> | galactose-6-phosphate isomerase                                                              |
| SMU_1496 | <i>lacA</i>      | galactose-6-phosphate isomerase                                                              |
| SMU_1674 | <i>patB</i>      | aminotransferase class II                                                                    |
| SMU_1675 | <i>metB</i>      | cystathionine gamma-synthase                                                                 |
| SMU_214c |                  | hypothetical protein                                                                         |
| SMU_435  | <i>nagA</i>      | N-acetylglucosamine-6-phosphate deacetylase                                                  |
| SMU_439  |                  | transcriptional regulator                                                                    |
| SMU_490  | <i>act pflC</i>  | pyruvate formate-lyase activating enzyme                                                     |
| SMU_496  | <i>cysK</i>      | cysteine synthetase A                                                                        |
| SMU_636  | <i>nagB</i>      | glucosamine-6-phosphate isomerase                                                            |
| SMU_638  | <i>rsuA</i>      | ribosomal small subunit pseudouridine synthase A                                             |
| SMU_639  | <i>rimJ</i>      | N-terminal acetyltransferase                                                                 |
| SMU_641  | <i>qor</i>       | oxidoreductase                                                                               |
| SMU_651c |                  | ABC transporter, periplasmic substrate-binding protein                                       |
| SMU_652c | <i>msmK</i>      | ABC transporter, ATP-binding protein (possible nitrate transport system)                     |
| SMU_653c | <i>tauC</i>      | ABC transporter, permease protein (possible taurine transport system permease)               |
| SMU_930c | <i>cpsY</i>      | transcriptional regulator                                                                    |
| SMU_932  |                  | conserved hypothetical protein                                                               |
| SMU_933  | <i>atmA</i>      | amino acid ABC transporter, amino acid substrate-binding protein                             |

---

|                |                  |                                                                        |
|----------------|------------------|------------------------------------------------------------------------|
| SMU_934        |                  | amino acid ABC transporter, permease protein                           |
| SMU_935        |                  | amino acid ABC transporter, permease protein                           |
| SMU_936        |                  | amino acid ABC transporter, ATP-binding protein                        |
| GlcN_Down (82) |                  |                                                                        |
| SMU_1002       | <i>topA</i>      | DNA topoisomerase I                                                    |
| SMU_1004       | <i>gtfB</i>      | glucosyltransferase-I                                                  |
| SMU_1175       | <i>dagA</i>      | sodium:alanine (or glycine) symporter                                  |
| SMU_1187       | <i>glmS</i>      | L-glutamine-D-fructose-6-phosphate amidotransferase                    |
| SMU_1249c      |                  | hypothetical protein                                                   |
| SMU_1250c      |                  | hypothetical protein                                                   |
| SMU_1315c      |                  | ABC transporter, ATP-binding protein                                   |
| SMU_1316c      |                  | hypothetical protein                                                   |
| SMU_1317c      |                  | hypothetical protein                                                   |
| SMU_1342       | <i>mubA bacA</i> | bacitracin synthetase                                                  |
| SMU_1343c      | <i>mubH pksC</i> | polyketide synthase                                                    |
| SMU_1344c      | <i>mubG fabD</i> | malonyl CoA-acyl carrier protein transacylase                          |
| SMU_1345c      | <i>mubE ituA</i> | peptide synthetase similar to mycA                                     |
| SMU_1346       | <i>mubT bacT</i> | thioesterase II-like protein                                           |
| SMU_1390       |                  | conserved hypothetical protein                                         |
| SMU_1396       | <i>gbpC</i>      | glucan-binding protein C                                               |
| SMU_1419       | <i>acrR2</i>     | Transcriptional regulator                                              |
| SMU_150        | <i>nImA</i>      | non-lantibiotic mutacin IV A                                           |
| SMU_1502c      |                  | conserved hypothetical protein                                         |
| SMU_1505c      | <i>pheT</i>      | conserved hypothetical protein (phenylalanyl-tRNA synthetase fragment) |
| SMU_151        | <i>nImB</i>      | non-lantibiotic mutacin IV B                                           |
| SMU_152        |                  | immunity protein for NImAB                                             |
| SMU_153        |                  | hypothetical protein                                                   |
| SMU_1595       | <i>cah</i>       | carbonic anhydrase (carbonate dehydratase)                             |
| SMU_169        | <i>rplM</i>      | 50S ribosomal protein L13                                              |
| SMU_170        | <i>rpsI</i>      | 30S ribosomal protein S9                                               |
| SMU_1884c      |                  | conserved hypothetical protein                                         |
| SMU_1902c      | <i>bsmK</i>      | hypothetical protein                                                   |
| SMU_1903c      |                  | hypothetical protein                                                   |
| SMU_1904c      |                  | hypothetical protein                                                   |
| SMU_1905c      | <i>bsmL</i>      | hypothetical protein                                                   |
| SMU_1906c      | <i>bsmB</i>      | bacteriocin-related protein                                            |
| SMU_1908c      |                  | hypothetical protein                                                   |
| SMU_1909c      |                  | putative mutacin immunity protein                                      |
| SMU_1910c      |                  | hypothetical protein                                                   |
| SMU_1912c      |                  | hypothetical protein                                                   |

---

|           |                  |                                                       |
|-----------|------------------|-------------------------------------------------------|
| SMU_1913c | <i>blpI</i>      | hypothetical protein; immunity protein, BLpL-like     |
| SMU_1914c | <i>nImC cipB</i> | mutacin V                                             |
| SMU_1927  | <i>psaA</i>      | PsaA protein/ ABC transporter, ATP-binding protein    |
| SMU_1928  | <i>psaB</i>      | protein secretion ABC transport permease              |
| SMU_1945  |                  | conserved hypothetical protein                        |
| SMU_1946  |                  | conserved hypothetical protein                        |
| SMU_1947  | <i>nusG</i>      | transcription antitermination factor                  |
| SMU_1966c | <i>levT rbsB</i> | ABC transport ribose-binding protein, periplasmic     |
| SMU_1992  | <i>tyrS</i>      | tyrosyl-tRNA synthetase                               |
| SMU_1999c | <i>gshA</i>      | glutamate--cysteine ligase                            |
| SMU_2026c | <i>rps1 rpsJ</i> | 30S ribosomal protein S10 fragment                    |
| SMU_2126c |                  | possible phosphorylase                                |
| SMU_2129c |                  | conserved hypothetical protein                        |
| SMU_2135c | <i>rpsD rs4</i>  | 30S Ribosomal protein S4                              |
| SMU_2146c |                  | conserved hypothetical protein                        |
| SMU_231   | <i>als ilvB</i>  | acetolactate synthase, large subunit (AHAS)           |
| SMU_232   | <i>ilvH</i>      | acetolactate synthase, small subunit                  |
| SMU_233   | <i>ilvC</i>      | ketol-acid reductoisomerase                           |
| SMU_277   |                  | hypothetical protein                                  |
| SMU_278   |                  | hypothetical protein                                  |
| SMU_279   |                  | hypothetical protein                                  |
| SMU_281   |                  | hypothetical protein                                  |
| SMU_284   | <i>nImT</i>      | transport and processing of non-lantibiotic mutacins  |
| SMU_285   | <i>nImE</i>      | transport and processing of non-lantibiotic mutacins  |
| SMU_365   | <i>gltA gltB</i> | glutamate synthase, large subunit                     |
| SMU_366   | <i>gltD</i>      | glutamate synthase, small subunit                     |
| SMU_383c  |                  | undetermined reductase or epimerase                   |
| SMU_396   | <i>glpF</i>      | glycerol uptake facilitator protein                   |
| SMU_42    |                  | conserved hypothetical protein                        |
| SMU_423   | <i>nImD</i>      | mutacin VI                                            |
| SMU_531   | <i>pheA</i>      | chorismate mutase; possible prephenate dehydrogenase  |
| SMU_595   | <i>pyrD</i>      | dihydroorotate dehydrogenase (dihydroorotate oxidase) |
| SMU_600c  |                  | conserved hypothetical protein                        |
| SMU_602   |                  | sodium-dependent transporter                          |
| SMU_63c   |                  | conserved hypothetical protein                        |
| SMU_711   |                  | conserved hypothetical protein                        |
| SMU_730   |                  | conserved hypothetical protein                        |
| SMU_731   |                  | ABC transporter, ATP-binding protein                  |
| SMU_758c  |                  | conserved hypothetical protein                        |
| SMU_913   | <i>gdhA</i>      | NADP-specific glutamate dehydrogenase                 |
| SMU_914c  |                  | conserved hypothetical protein                        |

---

---

|          |                  |                                                     |
|----------|------------------|-----------------------------------------------------|
| SMU_915c |                  | conserved hypothetical protein                      |
| SMU_916c |                  | conserved hypothetical protein                      |
| SMU_917c | <i>ygcM ykvK</i> | 6-pyruvoyl tetrahydropterin synthase, PTPS          |
| SMU_919c |                  | ATPase, confers aluminum resistance                 |
| SMU_1187 | <i>glmS</i>      | L-glutamine-D-fructose-6-phosphate amidotransferase |

---

**Table S2.** DEG identified in *S. mutans* UA159 grown on GlcNAc compared to glucose.

SMU# in red denotes up-regulation, and SMU# in blue denotes down-regulation.

| SMU#           | Gene name        | Gene function                                                                                                                         |
|----------------|------------------|---------------------------------------------------------------------------------------------------------------------------------------|
| GlcNAc_Up (43) |                  |                                                                                                                                       |
| SMU_132        | <i>hipO</i>      | amino acid amidohydrolase (hippurate amidohydrolase)                                                                                  |
| SMU_201c       |                  | conserved hypothetical protein                                                                                                        |
| SMU_209c       |                  | hypothetical protein                                                                                                                  |
| SMU_210c       |                  | hypothetical protein                                                                                                                  |
| SMU_211c       |                  | hypothetical protein                                                                                                                  |
| SMU_2133c      |                  | conserved hypothetical protein (possible transmembrane protein)                                                                       |
| SMU_213c       |                  | hypothetical protein                                                                                                                  |
| SMU_29         | <i>purC</i>      | phosphoribosylaminoimidazole-succinocarboxamide synthase                                                                              |
| SMU_30         | <i>purL</i>      | phosphoribosylformylglycinamide synthase                                                                                              |
| SMU_31         |                  | conserved hypothetical protein                                                                                                        |
| SMU_32         | <i>purB purF</i> | amidophosphoribosyltransferase                                                                                                        |
| SMU_33         |                  | hypothetical protein                                                                                                                  |
| SMU_34         | <i>purM</i>      | phosphoribosylformylglycinamide cyclo-ligase (AIRS)                                                                                   |
| SMU_35         | <i>purN</i>      | phosphoribosylglycinamide formyltransferase                                                                                           |
| SMU_36         |                  | conserved hypothetical protein (eukaryotic-like)<br>phosphoribosylaminoimidazolecarboxamide formyltransferase / IMP<br>cyclohydrolase |
| SMU_37         | <i>purH</i>      |                                                                                                                                       |
| SMU_961        |                  | macrophage infectivity potentiator-related protein                                                                                    |
| SMU_962        | <i>mmgC</i>      | acyl-CoA dehydrogenase                                                                                                                |
| SMU_1425       | <i>clpB</i>      | ATP-dependent Clp protease, ATP-binding subunit ClpB                                                                                  |
| SMU_1492       | <i>lacF</i>      | PTS system, lactose-specific IIA component                                                                                            |
| SMU_1494       | <i>lacC</i>      | tagatose-6-phosphate kinase                                                                                                           |
| SMU_1495       | <i>lacB rpiB</i> | galactose-6-phosphate isomerase                                                                                                       |
| SMU_1496       | <i>lacA</i>      | galactose-6-phosphate isomerase                                                                                                       |
| SMU_1674       | <i>patB</i>      | aminotransferase class II                                                                                                             |
| SMU_1675       | <i>metB</i>      | cystathionine gamma-synthase                                                                                                          |
| SMU_214c       |                  | hypothetical protein                                                                                                                  |
| SMU_435        | <i>nagA</i>      | N-acetylglucosamine-6-phosphate deacetylase                                                                                           |
| SMU_439        |                  | transcriptional regulator                                                                                                             |
| SMU_490        | <i>act pflC</i>  | pyruvate formate-lyase activating enzyme                                                                                              |
| SMU_496        | <i>cysK</i>      | cysteine synthetase A                                                                                                                 |
| SMU_636        | <i>nagB</i>      | glucosamine-6-phosphate isomerase                                                                                                     |
| SMU_638        | <i>rsuA</i>      | ribosomal small subunit pseudouridine synthase A                                                                                      |
| SMU_639        | <i>rimJ</i>      | N-terminal acetyltransferase                                                                                                          |
| SMU_641        | <i>qor</i>       | oxidoreductase                                                                                                                        |
| SMU_651c       |                  | ABC transporter, periplasmic substrate-binding protein                                                                                |



|                 |             |                                                                                |
|-----------------|-------------|--------------------------------------------------------------------------------|
| SMU_652c        | <i>msmK</i> | ABC transporter, ATP-binding protein (possible nitrate transport system)       |
| SMU_653c        | <i>tauC</i> | ABC transporter, permease protein (possible taurine transport system permease) |
| SMU_930c        | <i>cpsY</i> | transcriptional regulator                                                      |
| SMU_932         |             | conserved hypothetical protein                                                 |
| SMU_933         | <i>atmA</i> | amino acid ABC transporter, amino acid substrate-binding protein               |
| SMU_934         |             | amino acid ABC transporter, permease protein                                   |
| SMU_935         |             | amino acid ABC transporter, permease protein                                   |
| SMU_936         |             | amino acid ABC transporter, ATP-binding protein                                |
| GlcNAc_Down (2) |             |                                                                                |
| SMU_637c        |             | hypothetical protein                                                           |
| SMU_1187        | <i>glmS</i> | L-glutamine-D-fructose-6-phosphate amidotransferase                            |

**Table S3.** DEG identified in *S. mutans* UA159 common to both GlcN and GlcNAc cultures.

SMU# in red denotes up-regulation, and SMU# in blue denotes down-regulation.

| SMU#            | Gene name        | Gene function                                                                  |
|-----------------|------------------|--------------------------------------------------------------------------------|
| <b>Up (25)</b>  |                  |                                                                                |
| SMU_1425        | <i>clpB</i>      | ATP-dependent Clp protease, ATP-binding subunit ClpB                           |
| SMU_1492        | <i>lacF</i>      | PTS system, lactose-specific IIA component                                     |
| SMU_1494        | <i>lacC</i>      | tagatose-6-phosphate kinase                                                    |
| SMU_1495        | <i>lacB rpiB</i> | galactose-6-phosphate isomerase                                                |
| SMU_1496        | <i>lacA</i>      | galactose-6-phosphate isomerase                                                |
| SMU_1674        | <i>patB</i>      | aminotransferase class II                                                      |
| SMU_1675        | <i>metB</i>      | cystathionine gamma-synthase                                                   |
| SMU_214c        |                  | hypothetical protein                                                           |
| SMU_435         | <i>nagA</i>      | N-acetylglucosamine-6-phosphate deacetylase                                    |
| SMU_439         |                  | transcriptional regulator                                                      |
| SMU_490         | <i>act pflC</i>  | pyruvate formate-lyase activating enzyme                                       |
| SMU_496         | <i>cysK</i>      | cysteine synthetase A                                                          |
| SMU_636         | <i>nagB</i>      | glucosamine-6-phosphate isomerase                                              |
| SMU_638         | <i>rsuA</i>      | ribosomal small subunit pseudouridine synthase A                               |
| SMU_639         | <i>rimJ</i>      | N-terminal acetyltransferase                                                   |
| SMU_641         | <i>qor</i>       | oxidoreductase                                                                 |
| SMU_651c        |                  | ABC transporter, periplasmic substrate-binding protein                         |
| SMU_652c        | <i>msmK</i>      | ABC transporter, ATP-binding protein (possible nitrate transport system)       |
| SMU_653c        | <i>tauC</i>      | ABC transporter, permease protein (possible taurine transport system permease) |
| SMU_930c        | <i>cpsY</i>      | transcriptional regulator                                                      |
| SMU_932         |                  | conserved hypothetical protein                                                 |
| SMU_933         | <i>atmA</i>      | amino acid ABC transporter, amino acid substrate-binding protein               |
| SMU_934         |                  | amino acid ABC transporter, permease protein                                   |
| SMU_935         |                  | amino acid ABC transporter, permease protein                                   |
| SMU_936         |                  | amino acid ABC transporter, ATP-binding protein                                |
| <b>Down (1)</b> |                  |                                                                                |
| SMU_1187        | <i>glmS</i>      | L-glutamine-D-fructose-6-phosphate amidotransferase                            |

**Table S4.** DEG identified in *S. gordonii* DL1 grown on GlcN compared to glucose. SGO# in red denotes up-regulation, and SGO# in blue denotes down-regulation. Also indicated are the 30 upregulated DEG shared by GlcN and GlcNAc.

| SGO_R#      | SGO#     | Gene name     | Function                                                      |
|-------------|----------|---------------|---------------------------------------------------------------|
| GlcN (129)  |          |               |                                                               |
| SGO_RS00105 | SGO_0021 |               | conserved domain protein                                      |
| SGO_RS00170 | SGO_0035 |               | phosphoribosylformylglycinamide synthase                      |
| SGO_RS00175 | SGO_0036 | <i>purF</i>   | amidophosphoribosyltransferase                                |
| SGO_RS00180 | SGO_0037 | <i>purM</i>   | phosphoribosylformylglycinamide cyclo-ligase                  |
| SGO_RS00215 | SGO_0045 |               | PTS system, IIC component                                     |
| SGO_RS00220 | SGO_0046 |               | PTS system, IID component                                     |
| SGO_RS00225 | SGO_0047 |               | PTS system, IIA component                                     |
| SGO_RS00230 | SGO_0048 |               | tagatose-6-phosphate ketose/aldose isomerase                  |
| SGO_RS00235 | SGO_0049 | <i>galM</i>   | aldose 1-epimerase                                            |
| SGO_RS00495 | SGO_0099 | <i>pulA-2</i> | pullulanase, type I                                           |
| SGO_RS00500 | SGO_0100 |               | maltose operon transcription repressor                        |
| SGO_RS00505 | SGO_0101 | <i>malA</i>   | Maltodextrose utilization protein malA                        |
| SGO_RS00510 | SGO_0102 |               | Maltodextrin transport system permease protein malD           |
| SGO_RS00515 | SGO_0103 |               | Maltodextrin transport system permease protein malC           |
| SGO_RS00520 | SGO_0104 |               | Maltose/maltodextrin-binding protein precursor                |
| SGO_RS00585 | SGO_0118 |               | N-acetylmannosamine-6-phosphate epimerase, putative           |
| SGO_RS00590 | SGO_0119 |               | conserved hypothetical protein subfamily                      |
| SGO_RS00595 | SGO_0120 |               | Bacterial extracellular solute-binding protein domain protein |
| SGO_RS00600 | SGO_0121 |               | ABC transporter, permease protein SP1689                      |
| SGO_RS00605 | SGO_0122 |               | ABC transporter, permease protein SP1688                      |
| SGO_RS00610 | SGO_0123 |               | oxidoreductase, Gfo/Idh/MocA family SP1325                    |
| SGO_RS00615 | SGO_0124 |               | N-acetylneuraminate lyase                                     |
| SGO_RS00620 | SGO_0125 | <i>xylR</i>   | glucokinase                                                   |
| SGO_RS00625 | SGO_0126 |               | BlpT protein, fusion                                          |
| SGO_RS00630 | SGO_0127 |               | phosphosugar-binding transcriptional regulator, RpiR family   |
| SGO_RS00800 | SGO_0162 | <i>abpB</i>   | amylase-binding protein B                                     |
| SGO_RS00960 | SGO_0196 |               | protease, putative                                            |
| SGO_RS01230 | SGO_0249 |               | hypothetical protein                                          |
| SGO_RS01240 | SGO_0251 |               | CAAX amino terminal protease family                           |
| SGO_RS01315 | SGO_0267 |               | amino acid permease family protein                            |
| SGO_RS01385 | SGO_0281 |               | PTS system, beta-glucoside-specific IIABC component           |
| SGO_RS01425 | SGO_0289 |               | CopAB ATPases metal-fist type repressor                       |
| SGO_RS01430 | SGO_0290 |               | copper -translocating P-type ATPase                           |
| SGO_RS01435 | SGO_0291 |               | copper-translocating P-type ATPase                            |

---

|             |          |             |                                                                    |
|-------------|----------|-------------|--------------------------------------------------------------------|
| SGO_RS01440 | SGO_0292 | <i>spxB</i> | pyruvate oxidase                                                   |
| SGO_RS01445 | SGO_0293 |             | glyoxalase family protein superfamily                              |
| SGO_RS01480 | SGO_0300 |             | membrane protein, putative                                         |
| SGO_RS01485 | SGO_0301 |             | ABC transporter ATP-binding protein-like protein                   |
| SGO_RS01490 | SGO_0302 |             | membrane protein, putative                                         |
| SGO_RS01495 | SGO_0303 |             | ABC transporter ATP-binding protein-like protein                   |
| SGO_RS01500 | SGO_0304 |             | membrane protein, putative                                         |
| SGO_RS01515 | SGO_0307 | <i>pabB</i> | chorismate binding enzyme                                          |
| SGO_RS01540 | SGO_0313 |             | HAD superfamily hydrolase                                          |
| SGO_RS01545 | SGO_0314 |             | phosphoglycerate mutase family protein                             |
| SGO_RS01550 | SGO_0315 |             | phosphoglycerate mutase family protein                             |
| SGO_RS01555 | SGO_0316 |             | LPXTG cell wall surface protein, serine protease, subtilase family |
| SGO_RS01560 | SGO_0317 |             | LPXTG cell wall surface protein, serine protease, subtilase family |
| SGO_RS01685 | SGO_0341 |             | lipoprotein, putative                                              |
| SGO_RS01740 | SGO_0352 |             | ABC transporter, ATP-binding protein SP1580                        |
| SGO_RS01750 | SGO_0354 |             | membrane spanning protein                                          |
| SGO_RS01920 | SGO_0385 |             | exo-beta-D-fructosidase                                            |
| SGO_RS01930 | SGO_0387 |             | conserved hypothetical protein                                     |
| SGO_RS01935 | SGO_0388 |             | LPXTG cell wall surface protein, zinc carboxypeptidase family      |
| SGO_RS02020 | SGO_0405 |             | Beta-N-acetylhexosaminidase precursor                              |
| SGO_RS02045 | SGO_0410 |             | integral membrane protein                                          |
| SGO_RS02050 | SGO_0411 |             | conserved hypothetical protein TIGR01440                           |
| SGO_RS02180 | SGO_0440 |             | L-iditol 2-dehydrogenase BH3949                                    |
| SGO_RS02360 | SGO_0477 |             | cell wall binding protein                                          |
| SGO_RS02365 | SGO_0478 |             | cell wall binding protein                                          |
| SGO_RS02465 | SGO_0498 | <i>dsg</i>  | putative permease                                                  |
| SGO_RS03100 | SGO_0630 |             | Glycerol uptake facilitator protein                                |
| SGO_RS03105 | SGO_0631 |             | alpha-glycerophosphate oxidase                                     |
| SGO_RS03110 | SGO_0632 | <i>glpK</i> | glycerol kinase                                                    |
| SGO_RS03115 | SGO_0633 |             | conserved hypothetical protein                                     |
| SGO_RS03380 | SGO_0686 |             | Transcriptional regulator, DeoR family                             |
| SGO_RS03390 | SGO_0688 |             | ATP dependent Clp protease, ATP-binding subunit, ClpE              |
| SGO_RS03550 | SGO_0721 |             | abpB-like dipeptidase lipoprotein                                  |
| SGO_RS03560 | SGO_0724 |             | dipeptidase                                                        |
| SGO_RS03565 | SGO_0725 |             | conserved hypothetical protein                                     |
| SGO_RS04560 | SGO_0932 | <i>galK</i> | Galactokinase                                                      |
| SGO_RS04565 | SGO_0933 | <i>galT</i> | galactose-1-phosphate uridylyltransferase                          |
| SGO_RS04725 | SGO_0965 |             | integral membrane protein                                          |
| SGO_RS05455 | SGO_1111 | <i>fruR</i> | phosphotransferase system repressor                                |
| SGO_RS05535 | SGO_1126 |             | Tyrosine recombinase xerC                                          |

---

---

|             |          |               |                                                                              |
|-------------|----------|---------------|------------------------------------------------------------------------------|
| SGO_RS05555 | SGO_1130 |               | dihydrolipoamide dehydrogenase                                               |
| SGO_RS05560 | SGO_1131 | <i>sucB</i>   | dihydrolipoamide S-acetyltransferase                                         |
| SGO_RS05565 | SGO_1132 |               | acetoin dehydrogenase                                                        |
| SGO_RS05570 | SGO_1133 | <i>acoA</i>   | acetoin dehydrogenase                                                        |
| SGO_RS05615 | SGO_1142 |               | hypothetical protein                                                         |
| SGO_RS05745 | SGO_1167 | <i>nox</i>    | NADH oxidase                                                                 |
| SGO_RS05815 | SGO_1182 |               | LPXTG cell wall surface protein                                              |
| SGO_RS06270 | SGO_1277 |               | conserved hypothetical protein                                               |
| SGO_RS06305 | SGO_1285 |               | ABC transporter, ATP-binding protein SP1282                                  |
| SGO_RS06460 | SGO_1317 |               | hypothetical protein                                                         |
| SGO_RS06940 | SGO_1415 |               | LPXTG cell wall surface protein, X-prolyl dipeptidylaminopeptidase, putative |
| SGO_RS07290 | SGO_1486 |               | beta-galactosidase                                                           |
| SGO_RS07300 | SGO_1488 |               | putative methyltransferase                                                   |
| SGO_RS07345 | SGO_1497 |               | ABC-type transporter, ATPase component                                       |
| SGO_RS07590 | SGO_1549 |               | PAP2 family protein                                                          |
| SGO_RS07595 | SGO_1550 | <i>glgP-1</i> | glycogen phosphorylase                                                       |
| SGO_RS07600 | SGO_1551 | <i>glgA</i>   | Glycogen synthase                                                            |
| SGO_RS07605 | SGO_1552 | <i>glgD</i>   | glucose-1-phosphate adenylyltransferase, GlgD subunit                        |
| SGO_RS07610 | SGO_1553 | <i>glgC</i>   | glucose-1-phosphate adenylyltransferase                                      |
| SGO_RS07615 | SGO_1554 | <i>glgB</i>   | 1,4-alpha-glucan branching enzyme                                            |
| SGO_RS07755 | SGO_1583 |               | hypothetical protein                                                         |
| SGO_RS07785 | SGO_1589 | <i>arcT</i>   | putative transaminase/peptidase                                              |
| SGO_RS07790 | SGO_1590 | <i>arcD</i>   | arginine-ornithine antiporter                                                |
| SGO_RS07795 | SGO_1591 | <i>arcC</i>   | carbamate kinase                                                             |
| SGO_RS07800 | SGO_1592 | <i>arcB</i>   | ornithine carbamoyltransferase                                               |
| SGO_RS07805 | SGO_1593 | <i>arcA</i>   | arginine deiminase                                                           |
| SGO_RS08080 | SGO_1649 | <i>act</i>    | pyruvate formate-lyase-activating enzyme                                     |
| SGO_RS08520 | SGO_1738 |               | conserved hypothetical protein                                               |
| SGO_RS08525 | SGO_1739 |               | LytTr DNA-binding domain family                                              |
| SGO_RS08660 | SGO_1766 |               | Glycosyl hydrolase family 20, catalytic domain family                        |
| SGO_RS08665 | SGO_1767 |               | ROK family protein                                                           |
| SGO_RS08670 | SGO_1768 |               | glycosyl hydrolase, family 38                                                |
| SGO_RS08675 | SGO_1769 |               | Protein of unknown function (DUF1237) superfamily                            |
| SGO_RS08855 | SGO_1805 | <i>hutU</i>   | urocanate hydratase                                                          |
| SGO_RS09090 | SGO_1856 |               | ATP-dependent proteinase ATP-binding chain                                   |
| SGO_RS09250 | SGO_1889 |               | conserved hypothetical protein                                               |
| SGO_RS09255 | SGO_1890 |               | PTS system, fructose(mannose)-specific IID                                   |
| SGO_RS09260 | SGO_1891 |               | PTS system, IIC component                                                    |
| SGO_RS09270 | SGO_1893 |               | PTS system, fructose(mannose)-specific IIA component                         |
| SGO_RS09460 | SGO_1932 |               | conserved hypothetical protein                                               |

---

|                  |          |               |                                                                  |
|------------------|----------|---------------|------------------------------------------------------------------|
| SGO_RS09465      | SGO_1933 |               | copper transport protein CopZ-related protein                    |
| SGO_RS09470      | SGO_1934 |               | copper-translocating P-type ATPase                               |
| SGO_RS09475      | SGO_1935 |               | negative transcriptional regulator, CopY                         |
| SGO_RS09785      |          |               | hypothetical protein                                             |
| SGO_RS10100      | SGO_2067 |               | conserved membrane protein, putative multidrug efflux associated |
| SGO_RS10105      | SGO_2068 |               | Protein of unknown function (DUF990) superfamily                 |
| SGO_RS10110      | SGO_2069 |               | ATP-binding protein of ABC transporter                           |
| SGO_RS10230      | SGO_2089 | <i>purK</i>   | phosphoribosylaminoimidazole carboxylase, ATPase subunit         |
| SGO_RS10235      | SGO_2090 | <i>purE</i>   | phosphoribosylaminoimidazole carboxylase, catalytic subunit      |
| SGO_RS10240      | SGO_2091 |               | conserved hypothetical protein                                   |
| SGO_RS10245      | SGO_2092 | <i>purD</i>   | phosphoribosylamine--glycine ligase                              |
| SGO_RS10275      | SGO_2100 |               | ABC transporter substrate-binding protein                        |
| SGO_RS10280      | SGO_2101 |               | ABC transporter, permease protein SP2198                         |
| SGO_RS10285      | SGO_2102 |               | conserved hypothetical protein                                   |
| SGO_RS10720      |          |               | hypothetical protein                                             |
| <hr/>            |          |               |                                                                  |
| GlcN_GlcNAc (30) |          |               |                                                                  |
| SGO_RS00205      | SGO_0043 |               | beta-galactosidase                                               |
| SGO_RS00210      | SGO_0044 |               | PTS system, IIB component                                        |
| SGO_RS01020      | SGO_0208 | <i>endoD</i>  | LPXTG cell wall surface protein, glycosyl hydrolase family       |
| SGO_RS01220      | SGO_0247 | <i>pfl</i>    | formate acetyltransferase                                        |
| SGO_RS02715      | SGO_0549 | <i>nagA</i>   | N-acetylglucosamine-6-phosphate deacetylase                      |
| SGO_RS02720      | SGO_0551 |               | hypothetical protein                                             |
| SGO_RS02725      | SGO_0552 |               | oxidoreductase, aldo/keto reductase family                       |
| SGO_RS02730      | SGO_0553 |               | acetyltransferase                                                |
| SGO_RS07410      | SGO_1512 | <i>lacG</i>   | 6-phospho-beta-galactosidase                                     |
| SGO_RS07415      | SGO_1513 | <i>lacE</i>   | PTS system, lactose-specific IIBC component                      |
| SGO_RS07420      | SGO_1514 | <i>lacF</i>   | PTS system, lactose-specific IIa component                       |
| SGO_RS07425      | SGO_1515 |               | antiterminator protein                                           |
| SGO_RS07430      | SGO_1516 | <i>lacD-2</i> | tagatose 1,6-diphosphate aldolase                                |
| SGO_RS07435      | SGO_1517 | <i>lacC</i>   | tagatose-6-phosphate kinase                                      |
| SGO_RS07440      | SGO_1518 | <i>lacB-2</i> | galactose-6-phosphate isomerase, LacB subunit                    |
| SGO_RS07445      | SGO_1519 | <i>lacA-1</i> | galactose-6-phosphate isomerase, LacA subunit                    |
| SGO_RS07450      | SGO_1520 |               | PTS system, IIC component                                        |
| SGO_RS07455      | SGO_1521 |               | PTS system IIB component (galactitol/fructose specific)          |
| SGO_RS07460      | SGO_1522 |               | PTS system enzyme IIBC component (galactitol/fructose specific)  |
| SGO_RS07465      | SGO_1523 | <i>lacD-1</i> | tagatose 1,6-diphosphate aldolase                                |
| SGO_RS07470      | SGO_1524 | <i>lacC-2</i> | tagatose-6-phosphate kinase                                      |
| SGO_RS07475      | SGO_1525 | <i>lacB-1</i> | galactose-6-phosphate isomerase, LacB subunit                    |
| SGO_RS07480      | SGO_1526 | <i>lacA-2</i> | galactose-6-phosphate isomerase, LacA subunit                    |

|                   |          |             |                                                   |
|-------------------|----------|-------------|---------------------------------------------------|
| SGO_RS07770       | SGO_1586 | <i>nagB</i> | glucosamine-6-phosphate isomerase                 |
| SGO_RS08095       | SGO_1652 | <i>treA</i> | intracellular glycosyl hydrolase                  |
| SGO_RS08100       | SGO_1653 | <i>treB</i> | trehalose PTS enzyme II                           |
| SGO_RS08645       | SGO_1763 |             | ABC transporter, substrate-binding protein SP0092 |
| SGO_RS08650       | SGO_1764 |             | ABC transporter, permease protein SP0091          |
| SGO_RS08655       | SGO_1765 |             | ABC transporter sugar binding protein             |
| SGO_RS10270       | SGO_2099 |             | ABC transporter ATP-binding protein               |
| <b>GlcN (144)</b> |          |             |                                                   |
| SGO_RS00045       | SGO_0009 | <i>recF</i> | DNA replication and repair protein RecF           |
| SGO_RS00050       | SGO_0010 |             | conserved hypothetical protein                    |
| SGO_RS00315       | SGO_0065 |             | hypothetical protein                              |
| SGO_RS00365       | SGO_0075 |             | hypothetical protein                              |
| SGO_RS00435       | SGO_0087 |             | transporter, major facilitator family             |
| SGO_RS00440       | SGO_0088 |             | transcription regulator, AcrR family              |
| SGO_RS00450       | SGO_0090 |             | transcriptional regulator, TetR family            |
| SGO_RS01115       | SGO_0226 |             | methyltransferase                                 |
| SGO_RS01160       | SGO_0235 |             | glycerol uptake facilitator protein-like protein  |
| SGO_RS01410       | SGO_0286 |             | DNA mismatch repair protein MutS, putative        |
| SGO_RS01415       | SGO_0287 |             | haloacid dehalogenase-like hydrolase, putative    |
| SGO_RS01420       | SGO_0288 |             | GDSL-like lipase/acylhydrolase                    |
| SGO_RS01745       | SGO_0353 |             | transport protein                                 |
| SGO_RS01755       | SGO_0355 |             | RNA methyltransferase, TrmH family, group 3       |
| SGO_RS01760       | SGO_0356 |             | hypothetical protein                              |
| SGO_RS01765       | SGO_0357 | <i>degV</i> | DegV family fatty acid binding protein            |
| SGO_RS01770       | SGO_0358 | <i>rplM</i> | ribosomal protein L13                             |
| SGO_RS01775       | SGO_0359 | <i>rpsI</i> | ribosomal protein S9                              |
| SGO_RS01860       |          |             | hypothetical protein                              |
| SGO_RS01865       | SGO_0374 |             | response regulator of the LytR/AlgR family        |
| SGO_RS01870       |          |             | hypothetical protein                              |
| SGO_RS02290       | SGO_0463 | <i>cydD</i> | putative ABC transporter (ATP-binding protein)    |
| SGO_RS02295       | SGO_0464 | <i>cydC</i> | putative ABC transporter (ATP-binding protein)    |
| SGO_RS02300       | SGO_0465 |             | conserved hypothetical protein                    |
| SGO_RS02305       | SGO_0466 |             | membrane protein, putative                        |
| SGO_RS02310       | SGO_0467 |             | ATP binding protein of ABC transporter            |
| SGO_RS02330       | SGO_0471 |             | DNA-binding protein                               |
| SGO_RS02335       | SGO_0472 |             | hypothetical protein                              |
| SGO_RS02340       | SGO_0473 |             | hypothetical protein                              |
| SGO_RS02345       | SGO_0474 |             | abortive infection protein                        |
| SGO_RS02350       | SGO_0475 |             | conserved hypothetical protein                    |
| SGO_RS02790       | SGO_0566 | <i>sgc</i>  | serine protease chollisin                         |
| SGO_RS02795       | SGO_0568 | <i>glyQ</i> | glycyl-tRNA synthetase, alpha subunit             |

---

|             |          |             |                                                        |
|-------------|----------|-------------|--------------------------------------------------------|
| SGO_RS02800 | SGO_0569 | <i>glyS</i> | glycyl-tRNA synthetase, beta subunit                   |
| SGO_RS02805 | SGO_0570 |             | conserved hypothetical protein                         |
| SGO_RS02985 | SGO_0606 | <i>cysK</i> | cysteine synthase A                                    |
| SGO_RS03070 | SGO_0623 |             | tRNA-Pro                                               |
| SGO_RS03135 | SGO_0637 |             | acetyltransferase, GNAT family                         |
| SGO_RS03140 | SGO_0638 |             | membrane protein, putative                             |
| SGO_RS03145 | SGO_0639 | <i>valS</i> | valyl-tRNA synthetase                                  |
| SGO_RS03355 | SGO_0681 | <i>ileS</i> | isoleucyl-tRNA synthetase                              |
| SGO_RS03495 | SGO_0710 |             | tRNA-Thr                                               |
| SGO_RS03655 | SGO_0744 |             | conserved hypothetical protein                         |
| SGO_RS03770 | SGO_0766 |             | esterase of alpha/beta hydrolase superfamily, putative |
| SGO_RS03775 | SGO_0767 |             | transport protein                                      |
| SGO_RS03780 | SGO_0769 |             | iron compound ABC transporter, ATP-binding protein     |
| SGO_RS03785 | SGO_0770 |             | FecCD transport family                                 |
| SGO_RS04495 | SGO_0917 |             | membrane protein, putative                             |
| SGO_RS04500 | SGO_0918 |             | Cobalt transport protein superfamily                   |
| SGO_RS04505 | SGO_0919 |             | abc transporter, ATP-binding protein                   |
| SGO_RS04510 | SGO_0920 |             | cobalt ABC transporter, ATP-binding protein            |
| SGO_RS04535 |          |             | hypothetical protein                                   |
| SGO_RS05135 | SGO_1046 |             | conserved hypothetical protein                         |
| SGO_RS05285 | SGO_1076 | <i>rpsT</i> | ribosomal protein S20                                  |
| SGO_RS05290 | SGO_1077 | <i>coaA</i> | pantothenate kinase                                    |
| SGO_RS05715 | SGO_1161 | <i>tatA</i> | twin-arginine translocation protein, Tat A/E family    |
| SGO_RS05720 | SGO_1162 | <i>tatC</i> | Sec-independent protein translocase TatC               |
| SGO_RS05725 | SGO_1163 |             | Iron permease FTR1 family                              |
| SGO_RS05730 | SGO_1164 |             | tat translocated dye-type peroxidase family            |
| SGO_RS05735 | SGO_1165 |             | lipoprotein, putative                                  |
| SGO_RS05945 | SGO_1211 |             | hypothetical protein                                   |
| SGO_RS06005 | SGO_1223 |             | Adenylate cyclase                                      |
| SGO_RS06065 | SGO_1235 |             | tRNA-Gln                                               |
| SGO_RS06075 | SGO_1237 |             | conserved hypothetical protein                         |
| SGO_RS06085 | SGO_1239 | <i>parC</i> | DNA topoisomerase IV, A subunit                        |
| SGO_RS06090 | SGO_1240 |             | CAAX amino terminal protease family                    |
| SGO_RS06095 | SGO_1241 |             | aminoglycoside adenylyltransferase                     |
| SGO_RS06100 | SGO_1242 |             | lipoprotein, putative                                  |
| SGO_RS06110 | SGO_1244 |             | conserved hypothetical protein                         |
| SGO_RS06230 | SGO_1268 |             | murein hydrolase export regulator                      |
| SGO_RS06235 | SGO_1269 |             | murein hydrolase exporter                              |
| SGO_RS06440 | SGO_1313 |             | pneumococcal histidine triad A protein                 |
| SGO_RS06445 | SGO_1314 |             | metal binding lipoprotein                              |
| SGO_RS06585 | SGO_1342 |             | ABC transporter, ATP-binding protein SP1715            |

---



---

|             |          |             |                                                                |
|-------------|----------|-------------|----------------------------------------------------------------|
| SGO_RS06590 | SGO_1343 |             | ABC transporter, ATP-binding protein SP1715                    |
| SGO_RS06735 | SGO_1374 | <i>aroE</i> | shikimate 5-dehydrogenase                                      |
| SGO_RS06740 | SGO_1375 | <i>aroD</i> | 3-dehydroquinate dehydratase, type I                           |
| SGO_RS06775 | SGO_1382 |             | tRNA-Arg                                                       |
| SGO_RS06820 | SGO_1391 |             | conserved hypothetical protein                                 |
| SGO_RS07170 | SGO_1461 |             | putative stress-responsive transcriptional regulator PspC      |
| SGO_RS07310 | SGO_1490 |             | NrdI protein, putative                                         |
| SGO_RS07385 | SGO_1506 |             | membrane protein, putative                                     |
| SGO_RS07670 | SGO_1566 | <i>argD</i> | acetylornithine aminotransferase (ACOAT)                       |
| SGO_RS07890 | SGO_1610 |             | hypothetical protein                                           |
| SGO_RS07910 | SGO_1614 |             | magnesium and cobalt transporter CorA family                   |
| SGO_RS07915 | SGO_1615 |             | CAAX amino terminal protease family                            |
| SGO_RS07920 | SGO_1616 |             | methyltransferase                                              |
| SGO_RS07925 | SGO_1617 | <i>prfC</i> | peptide chain release factor 3                                 |
| SGO_RS07965 | SGO_1626 |             | branched-chain amino acid ABC transporter, ATP-binding protein |
| SGO_RS08235 | SGO_1679 |             | phosphotransferase system enzyme II                            |
| SGO_RS08240 | SGO_1680 |             | phosphotransferase system enzyme II                            |
| SGO_RS08255 | SGO_1683 | <i>serS</i> | seryl-tRNA synthetase                                          |
| SGO_RS08345 | SGO_1702 |             | tRNA-Asn                                                       |
| SGO_RS08555 | SGO_1745 | <i>fba</i>  | fructose-1,6-bisphosphate aldolase, class II                   |
| SGO_RS08755 | SGO_1785 |             | nickel-cobalt-cadmium resistance protein; NccN                 |
| SGO_RS08840 | SGO_1802 |             | metal ABC transporter substrate-binding lipoprotein precursor  |
| SGO_RS08975 | SGO_1829 |             | tRNA-Lys                                                       |
| SGO_RS08980 | SGO_1830 | <i>Mga</i>  | Mga-like regulatory protein                                    |
| SGO_RS09015 | SGO_1838 |             | ABC transporter domain protein                                 |
| SGO_RS09345 | SGO_1909 |             | membrane protein, putative                                     |
| SGO_RS09505 | SGO_1941 |             | tRNA-Leu                                                       |
| SGO_RS09515 | SGO_1943 |             | tRNA-His                                                       |
| SGO_RS09525 | SGO_1945 |             | tRNA-Tyr                                                       |
| SGO_RS09585 | SGO_1957 |             | conserved hypothetical protein                                 |
| SGO_RS09590 | SGO_1958 | <i>rplQ</i> | ribosomal protein L17                                          |
| SGO_RS09595 | SGO_1959 | <i>rpoA</i> | DNA-directed RNA polymerase, alpha subunit                     |
| SGO_RS09600 | SGO_1960 | <i>rpsK</i> | ribosomal protein S11                                          |
| SGO_RS09605 | SGO_1961 | <i>rpsM</i> | ribosomal protein S13p/S18e                                    |
| SGO_RS09610 |          |             | hypothetical protein                                           |
| SGO_RS09615 | SGO_1964 | <i>adk</i>  | adenylate kinase (ATP-AMP transphosphorylase)                  |
| SGO_RS09620 | SGO_1965 |             | preprotein translocase secY subunit                            |
| SGO_RS09625 | SGO_1966 | <i>rplO</i> | ribosomal protein L15                                          |
| SGO_RS09630 | SGO_1967 |             | 50S ribosomal protein L30 -related protein                     |
| SGO_RS09635 | SGO_1968 | <i>rpsE</i> | ribosomal protein S5                                           |

---

---

|             |          |             |                                                      |
|-------------|----------|-------------|------------------------------------------------------|
| SGO_RS09640 | SGO_1969 | <i>rplR</i> | ribosomal protein L18                                |
| SGO_RS09645 | SGO_1970 | <i>BL10</i> | 50S ribosomal protein L6                             |
| SGO_RS09650 | SGO_1971 | <i>rpsH</i> | ribosomal protein S8                                 |
| SGO_RS09655 | SGO_1972 | <i>rpsN</i> | ribosomal protein S14p/S29e                          |
| SGO_RS09660 | SGO_1973 | <i>BL6</i>  | 50S ribosomal protein L5                             |
| SGO_RS09855 | SGO_2015 |             | possible polysaccharide transport protein            |
| SGO_RS09860 | SGO_2016 |             | nucleotide sugar dehydratase, putative               |
| SGO_RS09865 | SGO_2017 |             | nucleotidyl transferase, putative                    |
| SGO_RS09870 | SGO_2018 |             | extracellular polysaccharide polymerase putative     |
| SGO_RS09875 | SGO_2019 | <i>licD</i> | licD3 protein                                        |
| SGO_RS09880 | SGO_2020 |             | glycosyltransferase                                  |
| SGO_RS09885 | SGO_2021 |             | extracellular polysaccharide glycosyltransferase     |
| SGO_RS09890 | SGO_2022 |             | UDP-glucose 4-epimerase BH3715                       |
| SGO_RS09895 | SGO_2023 |             | galactosyltransferase                                |
| SGO_RS09900 | SGO_2024 |             | extracellular polysaccharide biosynthesis            |
| SGO_RS09905 | SGO_2025 | <i>wze</i>  | putative autophosphorylating protein tyrosine kinase |
| SGO_RS10090 | SGO_2065 | <i>rpmF</i> | ribosomal protein L32                                |
| SGO_RS10095 | SGO_2066 | <i>rpmG</i> | ribosomal protein L33                                |
| SGO_RS10120 |          |             | hypothetical protein                                 |
| SGO_RS10125 | SGO_2070 |             | conserved hypothetical protein                       |
| SGO_RS10130 | SGO_2071 |             | hypothetical protein                                 |
| SGO_RS10145 | SGO_2073 |             | FtsK/SpoIIIE family subfamily, putative              |
| SGO_RS10350 | SGO_2114 |             | tRNA-Ser                                             |
| SGO_RS10355 | SGO_2115 |             | tRNA-Met                                             |
| SGO_RS10360 | SGO_2116 |             | tRNA-Met                                             |
| SGO_RS10500 | SGO_2145 | <i>comE</i> | competence response regulator ComE                   |
| SGO_RS10510 | SGO_2147 | <i>comC</i> | competence factor-related protein ComC               |
| SGO_RS10515 | SGO_2148 |             | tRNA-Arg                                             |
| SGO_RS10600 |          |             | hypothetical protein                                 |
| SGO_RS10795 | SGO_1962 | <i>rpmJ</i> | ribosomal protein L36                                |

---

**Table S5.** DEG identified in *S. mutans* UA159 and *S. gordonii* DL1 when co-cultured on glucose, in comparison to UA159 and DL1, respectively, growing alone on glucose. Gene# in red indicates up-regulation, and Gene# in blue indicates down-regulation.

| Gene#               | Gene name        | Function                                                      |
|---------------------|------------------|---------------------------------------------------------------|
| UA159               |                  |                                                               |
| Glc_GlcN_GlcNAc (5) |                  |                                                               |
| SMU_182             | <i>sloA</i>      | ABC transporter, ATP-binding protein, iron and/or manganese   |
| SMU_183             | <i>sloB</i>      | manganese ABC transporter permease element                    |
| SMU_184             | <i>fimA lral</i> | ABC transporter element, iron predicted binding protein       |
| SMU_185             |                  | hypothetical protein                                          |
| SMU_186             | <i>sloR</i>      | metalloregulatory protein                                     |
| Glc_GlcNAc (1)      |                  |                                                               |
| SMU_770c            | <i>mntH hitA</i> | manganese transporter                                         |
| Glc (1)             |                  |                                                               |
| SMU_768c            |                  | hypothetical protein                                          |
| Glc_GlcN_GlcNAc (8) |                  |                                                               |
| SMU_1906c           | <i>bsmB</i>      | bacteriocin-related protein                                   |
| SMU_1914c           | <i>nImC cipB</i> | mutacin V                                                     |
| SMU_196c            |                  | immunogenic secreted protein (transfer protein)               |
| SMU_200c            |                  | hypothetical protein                                          |
| SMU_201c            |                  | conserved hypothetical protein                                |
| SMU_202c            |                  | conserved hypothetical protein/Streptococcus-specific protein |
| SMU_205c            |                  | conserved hypothetical protein                                |
| SMU_206c            |                  | hypothetical protein                                          |
| Glc_GlcNAc (13)     |                  |                                                               |
| SMU_150             | <i>nImA</i>      | non-lantibiotic mutacin IV A                                  |
| SMU_151             | <i>nImB</i>      | non-lantibiotic mutacin IV B                                  |
| SMU_153             |                  | hypothetical protein                                          |
| SMU_1902c           | <i>bsmK</i>      | hypothetical protein                                          |
| SMU_1903c           |                  | hypothetical protein                                          |
| SMU_1904c           |                  | hypothetical protein                                          |
| SMU_1905c           | <i>bsmL</i>      | hypothetical protein                                          |
| SMU_1908c           |                  | hypothetical protein                                          |
| SMU_1909c           |                  | putative mutacin immunity protein                             |
| SMU_1910c           |                  | hypothetical protein                                          |
| SMU_1912c           |                  | hypothetical protein                                          |
| SMU_1913c           | <i>blpI</i>      | hypothetical protein; immunity protein, BLpL-like             |

|                     |             |                                    |
|---------------------|-------------|------------------------------------|
| SMU_423             | <i>nImD</i> | mutacin VI                         |
| Glc (1)             |             |                                    |
| SMU_152             |             | immunity protein for NImAB         |
| Glc_GlcN (1)        |             |                                    |
| SMU_575c            | <i>IrgA</i> | murein hydrolase regulator         |
| DL1                 |             |                                    |
| Glc_GlcN (2)        |             |                                    |
| SGO_RS03070         |             | tRNA-Pro                           |
| SGO_RS09530         |             | tRNA-Phe                           |
| Glc_GlcN_GlcNAc (2) |             |                                    |
| SGO_RS09525         |             | tRNA-Tyr                           |
| SGO_RS10225         |             | hypothetical protein               |
| Glc_GlcN (2)        |             |                                    |
| SGO_RS00565         | <i>acdH</i> | alcohol-acetaldehyde dehydrogenase |
| SGO_RS03180         |             | conserved hypothetical protein     |

**Table S6.** DEG identified in *S. mutans* UA159 and *S. gordonii* DL1 when co-cultured on GlcN, in comparison to UA159 and DL1, respectively, growing alone on GlcN. Gene# in red indicates up-regulation, and Gene# in blue indicates down-regulation.

| Gene#                   | Gene name            | Function                                                    |
|-------------------------|----------------------|-------------------------------------------------------------|
| UA159                   |                      |                                                             |
| Glc_GlcN_GlcN<br>Ac (5) |                      |                                                             |
| SMU_182                 | <i>sloA</i>          | ABC transporter, ATP-binding protein, iron and/or manganese |
| SMU_183                 | <i>sloB</i>          | manganese ABC transporter permease element                  |
| SMU_184                 | <i>fimA lral</i>     | ABC transporter element, iron predicted binding protein     |
| SMU_185                 |                      | hypothetical protein                                        |
| SMU_186                 | <i>sloR</i>          | metalloregulatory protein                                   |
| GlcN (29)               |                      |                                                             |
| SMU_1315c               |                      | ABC transporter, ATP-binding protein                        |
| SMU_1316c               |                      | hypothetical protein                                        |
| SMU_1317c               |                      | hypothetical protein                                        |
| SMU_1341c               | <i>mubB grs mycB</i> | gramicidin S synthase/mycosubtilin synthetase chain mycB    |
| SMU_1342                | <i>mubA bacA</i>     | bacitracin synthetase                                       |
| SMU_1343c               | <i>mubH pksC</i>     | polyketide synthase                                         |
| SMU_1344c               | <i>mubG fabD</i>     | malonyl CoA-acyl carrier protein transacylase               |
| SMU_1345c               | <i>mubE ituA</i>     | peptide synthetase similar to mycA                          |
| SMU_1346                | <i>mubT bacT</i>     | thioesterase II-like protein                                |
| SMU_1390                |                      | conserved hypothetical protein                              |
| SMU_1884c               |                      | conserved hypothetical protein                              |
| SMU_1947                | <i>nusG</i>          | transcription antitermination factor                        |
| SMU_1992                | <i>tyrS</i>          | tyrosyl-tRNA synthetase                                     |
| SMU_2026c               | <i>rps1NA rpsJ</i>   | 30S ribosomal protein S10 fragment                          |
| SMU_2146c               |                      | conserved hypothetical protein                              |
| SMU_277                 |                      | hypothetical protein                                        |
| SMU_278                 |                      | hypothetical protein                                        |
| SMU_279                 |                      | hypothetical protein                                        |
| SMU_281                 |                      | hypothetical protein                                        |
| SMU_284                 | <i>nImT</i>          | transport and processing of non-lantibiotic mutacins        |
| SMU_285                 | <i>nImE</i>          | transport and processing of non-lantibiotic mutacins        |
| SMU_396                 | <i>glpF</i>          | glycerol uptake facilitator protein                         |
| SMU_531                 | <i>pheA</i>          | chorismate mutase; possible prephenate dehydrogenase        |
| SMU_595                 | <i>pyrD</i>          | dihydroorotate dehydrogenase (dihydroorotate oxidase)       |
| SMU_709                 |                      | conserved hypothetical protein                              |
| SMU_730                 |                      | conserved hypothetical protein                              |

|                         |                  |                                                                         |
|-------------------------|------------------|-------------------------------------------------------------------------|
| SMU_732                 |                  | conserved hypothetical protein                                          |
| SMU_734                 |                  | conserved hypothetical protein (probable membrane protein)              |
| SMU_758c                |                  | conserved hypothetical protein                                          |
| Glc_GlcN_GlcN<br>Ac (8) |                  |                                                                         |
| SMU_1906c               | <i>bsmB</i>      | bacteriocin-related protein                                             |
| SMU_1914c               | <i>nImC cipB</i> | mutacin V                                                               |
| SMU_196c                |                  | immunogenic secreted protein (transfer protein)                         |
| SMU_200c                |                  | hypothetical protein                                                    |
| SMU_201c                |                  | conserved hypothetical protein                                          |
| SMU_202c                |                  | conserved hypothetical protein/Streptococcus-specific protein           |
| SMU_205c                |                  | conserved hypothetical protein                                          |
| SMU_206c                |                  | hypothetical protein                                                    |
| GlcN (43)               |                  |                                                                         |
| SMU_113                 | <i>pfk</i>       | fructose-1-phosphate kinase                                             |
| SMU_114                 | <i>fruC</i>      | PTS system, fructose-specific IIBC component                            |
| SMU_1147c               |                  | involved in competence                                                  |
| SMU_115                 | <i>fruD</i>      | PTS system, fructose-specific IIA component                             |
| SMU_1152c               |                  | conserved hypothetical protein                                          |
| SMU_1153c               |                  | conserved hypothetical protein                                          |
| SMU_1154c               |                  | conserved hypothetical protein                                          |
| SMU_1156c               |                  | hypothetical protein                                                    |
| SMU_1157c               |                  | conserved hypothetical protein                                          |
| SMU_1158c               |                  | conserved hypothetical protein                                          |
| SMU_1159c               |                  | hypothetical protein                                                    |
| SMU_116                 | <i>lacD1</i>     | tagatose 1,6-aldolase                                                   |
| SMU_1287                | <i>pmrA tnrA</i> | transcriptional regulator                                               |
| SMU_1360c               |                  | hypothetical protein                                                    |
| SMU_1421                | <i>acoC yugF</i> | dihydrolipoamide acetyltransferase (acetoin dehydrogenase E2 component) |
| SMU_1422                | <i>acoB</i>      | acetoin dehydrogenase E1 component                                      |
| SMU_1423                | <i>acoA</i>      | acetoin dehydrogenase E1 component                                      |
| SMU_1424                | <i>acoL adhD</i> | dihydrolipoamide dehydrogenase                                          |
| SMU_1494                | <i>lacC</i>      | tagatose-6-phosphate kinase                                             |
| SMU_1495                | <i>lacB rpiB</i> | galactose-6-phosphate isomerase                                         |
| SMU_1561                | <i>trkB</i>      | potassium uptake protein B                                              |
| SMU_1562                | <i>trkA</i>      | potassium uptake protein A                                              |
| SMU_1563                | <i>pacL</i>      | cation-transporting P-ATPase                                            |
| SMU_1889c               |                  | hypothetical protein (possible relation to bacteriocin BlpU)            |
| SMU_194c                |                  | conserved hypothetical protein, phage-related                           |
| SMU_1956c               | <i>levX</i>      | conserved hypothetical protein                                          |
| SMU_1957                | <i>levG ptnD</i> | fructose-specific Enzyme IID component                                  |

|                  |                  |                                                                                |
|------------------|------------------|--------------------------------------------------------------------------------|
| SMU_1958c        | <i>levF</i>      | fructose-specific Enzyme IIC component                                         |
| SMU_1960c        | <i>levE</i>      | fructose-specific Enzyme IIB component                                         |
| SMU_1961c        | <i>levD ptfA</i> | fructose-specific Enzyme IIA component                                         |
| SMU_2027         |                  | transcriptional regulator/repressor                                            |
| SMU_212c         |                  | hypothetical protein                                                           |
| SMU_490          | <i>act pflC</i>  | pyruvate formate-lyase activating enzyme                                       |
| SMU_651c         |                  | ABC transporter, periplasmic substrate-binding protein                         |
| SMU_652c         | <i>msmK</i>      | ABC transporter, ATP-binding protein (possible nitrate transport system)       |
| SMU_653c         | <i>tauC</i>      | ABC transporter, permease protein (possible taurine transport system permease) |
| SMU_930c         | <i>cpsY</i>      | transcriptional regulator                                                      |
| SMU_932          |                  | conserved hypothetical protein                                                 |
| SMU_933          | <i>atmA</i>      | amino acid ABC transporter, amino acid substrate-binding protein               |
| SMU_934          |                  | amino acid ABC transporter, permease protein                                   |
| SMU_935          |                  | amino acid ABC transporter, permease protein                                   |
| SMU_936          |                  | amino acid ABC transporter, ATP-binding protein                                |
| SMU_956          | <i>clpE clpL</i> | ATP-dependent Clp protease, ATP-binding subunit                                |
| GlcN_GlcNAc (18) |                  |                                                                                |
| SMU_1674         | <i>patB</i>      | aminotransferase class II                                                      |
| SMU_1675         | <i>metB</i>      | cystathionine gamma-synthase                                                   |
| SMU_191c         |                  | phage-related integrase                                                        |
| SMU_193c         |                  | conserved hypothetical protein                                                 |
| SMU_195c         |                  | hypothetical protein                                                           |
| SMU_197c         |                  | hypothetical protein                                                           |
| SMU_198c         | <i>tpn</i>       | conjugative transposon protein                                                 |
| SMU_199c         |                  | hypothetical protein                                                           |
| SMU_204c         |                  | hypothetical protein                                                           |
| SMU_207c         |                  | transcriptional regulator                                                      |
| SMU_208c         |                  | conserved hypothetical protein, FtsK/SpoIIIE family                            |
| SMU_209c         |                  | hypothetical protein                                                           |
| SMU_210c         |                  | hypothetical protein                                                           |
| SMU_211c         |                  | hypothetical protein                                                           |
| SMU_214c         |                  | hypothetical protein                                                           |
| SMU_216c         |                  | hypothetical protein                                                           |
| SMU_496          | <i>cysK</i>      | cysteine synthetase A                                                          |
| SMU_574c         | <i>lrgB</i>      | effector of murein hydrolase                                                   |
| Glc_GlcN (1)     |                  |                                                                                |
| SMU_575c         | <i>lrgA</i>      | murein hydrolase regulator                                                     |
| DL1              |                  |                                                                                |
| GlcN (162)       |                  |                                                                                |

---

|             |             |                                                               |
|-------------|-------------|---------------------------------------------------------------|
| SGO_RS00045 | <i>recF</i> | DNA replication and repair protein RecF                       |
| SGO_RS00050 |             | conserved hypothetical protein                                |
| SGO_RS00315 |             | hypothetical protein                                          |
| SGO_RS00585 |             | N-acetylmannosamine-6-phosphate epimerase, putative           |
| SGO_RS00590 |             | conserved hypothetical protein subfamily                      |
| SGO_RS00750 | <i>tgt</i>  | queuine tRNA-ribosyltransferase                               |
| SGO_RS01000 | <i>rpsL</i> | ribosomal protein S12                                         |
| SGO_RS01005 | <i>rpsG</i> | ribosomal protein S7                                          |
| SGO_RS01015 | <i>gap</i>  | glyceraldehyde-3-phosphate dehydrogenase, type I              |
| SGO_RS01160 |             | glycerol uptake facilitator protein-like protein              |
| SGO_RS01165 |             | membrane protein, putative                                    |
| SGO_RS01535 | <i>xfp</i>  | D-xylulose 5-phosphate/D-fructose 6-phosphate phosphoketolase |
| SGO_RS01735 |             | leucine-rich protein                                          |
| SGO_RS01745 |             | transport protein                                             |
| SGO_RS01755 |             | RNA methyltransferase, TrmH family, group 3                   |
| SGO_RS01760 |             | hypothetical protein                                          |
| SGO_RS01765 | <i>degV</i> | DegV family fatty acid binding protein                        |
| SGO_RS01770 | <i>rplM</i> | ribosomal protein L13                                         |
| SGO_RS01775 | <i>rpsI</i> | ribosomal protein S9                                          |
| SGO_RS02035 | <i>zmpB</i> | zinc metalloproteinase B                                      |
| SGO_RS02140 |             | GTP-sensing transcriptional pleiotropic repressor codY        |
| SGO_RS02165 | <i>gatB</i> | glutamyl-tRNA(Gln) amidotransferase, B subunit                |
| SGO_RS02330 |             | DNA-binding protein                                           |
| SGO_RS02335 |             | hypothetical protein                                          |
| SGO_RS02340 |             | hypothetical protein                                          |
| SGO_RS02345 |             | abortive infection protein                                    |
| SGO_RS02350 |             | conserved hypothetical protein                                |
| SGO_RS02460 | <i>gtfG</i> | glucosyltransferase G                                         |
| SGO_RS02600 | <i>ilvB</i> | acetolactate synthase, large subunit, biosynthetic type       |
| SGO_RS02605 | <i>ilvN</i> | acetolactate synthase, small subunit                          |
| SGO_RS02790 | <i>sgc</i>  | serine protease challisin                                     |
| SGO_RS02795 | <i>glyQ</i> | glycyl-tRNA synthetase, alpha subunit                         |
| SGO_RS02800 | <i>glyS</i> | glycyl-tRNA synthetase, beta subunit                          |
| SGO_RS02805 |             | conserved hypothetical protein                                |
| SGO_RS02985 | <i>cysK</i> | cysteine synthase A                                           |
| SGO_RS03355 | <i>ileS</i> | isoleucyl-tRNA synthetase                                     |
| SGO_RS03740 | <i>tuf</i>  | translation elongation factor Tu                              |
| SGO_RS03815 |             | hypothetical protein                                          |
| SGO_RS03820 | <i>thrS</i> | threonyl-tRNA synthetase                                      |
| SGO_RS04190 | <i>cshA</i> | surface-associated protein CshA                               |
| SGO_RS04200 |             | ABC transporter, substrate binding protein                    |

---



---

|             |             |                                                            |
|-------------|-------------|------------------------------------------------------------|
| SGO_RS04205 |             | ABC transporter, permease protein                          |
| SGO_RS04210 |             | ABC transporter, ATP-binding protein                       |
| SGO_RS04495 |             | membrane protein, putative                                 |
| SGO_RS04500 |             | Cobalt transport protein superfamily                       |
| SGO_RS04505 |             | abc transporter, ATP-binding protein                       |
| SGO_RS04510 |             | cobalt ABC transporter, ATP-binding protein                |
| SGO_RS04535 |             | hypothetical protein                                       |
| SGO_RS04785 |             | conserved hypothetical protein                             |
| SGO_RS04815 |             | amino acid ABC transporter, amino acid-binding protein     |
| SGO_RS04820 |             | amino acid ABC transporter, ATP-binding protein SP0709     |
| SGO_RS04825 |             | amino acid ABC transporter, permease protein SP0710        |
| SGO_RS04830 |             | amino acid ABC transporter, permease protein SP0711        |
| SGO_RS05065 | <i>infC</i> | translation initiation factor IF-3                         |
| SGO_RS05135 |             | conserved hypothetical protein                             |
| SGO_RS05285 | <i>rpsT</i> | ribosomal protein S20                                      |
| SGO_RS05835 |             | ABC transporter, permease/ATP-binding protein              |
| SGO_RS05850 | <i>rplL</i> | ribosomal protein L7/L12                                   |
| SGO_RS05855 | <i>BL5</i>  | 50S ribosomal protein L10                                  |
| SGO_RS06060 | <i>rpsA</i> | 30S ribosomal protein S1                                   |
| SGO_RS06065 |             | tRNA-Gln                                                   |
| SGO_RS06075 |             | conserved hypothetical protein                             |
| SGO_RS06085 | <i>parC</i> | DNA topoisomerase IV, A subunit                            |
| SGO_RS06090 |             | CAAX amino terminal protease family                        |
| SGO_RS06095 |             | aminoglycoside adenylyltransferase                         |
| SGO_RS06100 |             | lipoprotein, putative                                      |
| SGO_RS06110 |             | conserved hypothetical protein                             |
| SGO_RS06230 |             | murein hydrolase export regulator                          |
| SGO_RS06235 |             | murein hydrolase exporter                                  |
| SGO_RS06440 |             | pneumococcal histidine triad A protein                     |
| SGO_RS06445 |             | metal binding lipoprotein                                  |
| SGO_RS06485 |             | KH domain protein                                          |
| SGO_RS06490 | <i>rpsP</i> | ribosomal protein S16                                      |
| SGO_RS06585 |             | ABC transporter, ATP-binding protein SP1715                |
| SGO_RS06590 |             | ABC transporter, ATP-binding protein SP1715                |
| SGO_RS06740 | <i>aroD</i> | 3-dehydroquinate dehydratase, type I                       |
| SGO_RS06820 |             | conserved hypothetical protein                             |
| SGO_RS07145 | <i>rplK</i> | ribosomal protein L11                                      |
| SGO_RS07295 |             | LPXTG cell wall surface protein, Cna protein B-type domain |
| SGO_RS07310 |             | NrdI protein, putative                                     |
| SGO_RS07315 |             | hypothetical protein                                       |
| SGO_RS07385 |             | membrane protein, putative                                 |

---

---

|             |             |                                                                       |
|-------------|-------------|-----------------------------------------------------------------------|
| SGO_RS07670 | <i>argD</i> | acetylornithine aminotransferase (ACOAT)                              |
| SGO_RS07675 | <i>argB</i> | acetylglutamate kinase                                                |
| SGO_RS07680 | <i>argJ</i> | arginine biosynthesis bifunctional protein ArgJ                       |
| SGO_RS07965 |             | branched-chain amino acid ABC transporter, ATP-binding protein        |
| SGO_RS07970 |             | branched-chain amino acid ABC transporter, ATP-binding protein        |
| SGO_RS07975 | <i>braE</i> | branched-chain amino acid ABC transporter, permease protein           |
| SGO_RS07980 | <i>livH</i> | branched-chain amino acid ABC transporter, permease protein           |
|             |             | branched-chain amino acid ABC transporter, amino acid-binding protein |
| SGO_RS07985 |             |                                                                       |
| SGO_RS08235 |             | phosphotransferase system enzyme II                                   |
| SGO_RS08240 |             | phosphotransferase system enzyme II                                   |
| SGO_RS08245 |             | PTS system, mannose/fructose/sorbose family, IID component            |
| SGO_RS08255 | <i>serS</i> | seryl-tRNA synthetase                                                 |
| SGO_RS08260 |             | acyl-CoA dehydrogenase family                                         |
| SGO_RS08265 |             | putative peroxidase / antioxidant                                     |
| SGO_RS08345 |             | tRNA-Asn                                                              |
| SGO_RS08375 | <i>amiF</i> | oligopeptide transport ATP-binding protein amiF                       |
| SGO_RS08380 | <i>amiE</i> | oligopeptide transport ATP-binding protein                            |
| SGO_RS08385 | <i>amiD</i> | oligopeptide transport system permease protein                        |
| SGO_RS08390 | <i>hppB</i> | oligopeptide transport system permease                                |
| SGO_RS08755 |             | nickel-cobalt-cadmium resistance protein; NccN                        |
| SGO_RS08975 |             | tRNA-Lys                                                              |
| SGO_RS09200 | <i>rpsR</i> | ribosomal protein S18                                                 |
| SGO_RS09210 | <i>rpsF</i> | ribosomal protein S6                                                  |
| SGO_RS09345 |             | membrane protein, putative                                            |
| SGO_RS09505 |             | tRNA-Leu                                                              |
| SGO_RS09510 |             | tRNA-Gln                                                              |
| SGO_RS09515 |             | tRNA-His                                                              |
| SGO_RS09520 |             | tRNA-Trp                                                              |
| SGO_RS09540 |             | tRNA-Ser                                                              |
| SGO_RS09590 | <i>rplQ</i> | ribosomal protein L17                                                 |
| SGO_RS09595 | <i>rpoA</i> | DNA-directed RNA polymerase, alpha subunit                            |
| SGO_RS09600 | <i>rpsK</i> | ribosomal protein S11                                                 |
| SGO_RS09605 | <i>rpsM</i> | ribosomal protein S13p/S18e                                           |
| SGO_RS09610 |             | hypothetical protein                                                  |
| SGO_RS09615 | <i>adk</i>  | adenylate kinase (ATP-AMP transphosphorylase)                         |
| SGO_RS09620 |             | preprotein translocase secY subunit                                   |
| SGO_RS09625 | <i>rplO</i> | ribosomal protein L15                                                 |
| SGO_RS09630 |             | 50S ribosomal protein L30 -related protein                            |
| SGO_RS09635 | <i>rpsE</i> | ribosomal protein S5                                                  |
| SGO_RS09645 | <i>BL10</i> | 50S ribosomal protein L6                                              |

---

---

|             |             |                                                      |
|-------------|-------------|------------------------------------------------------|
| SGO_RS09650 | <i>rpsH</i> | ribosomal protein S8                                 |
| SGO_RS09655 | <i>rpsN</i> | ribosomal protein S14p/S29e                          |
| SGO_RS09660 | <i>BL6</i>  | 50S ribosomal protein L5                             |
| SGO_RS09665 | <i>rplX</i> | ribosomal protein L24                                |
| SGO_RS09670 | <i>rplN</i> | ribosomal protein L14                                |
| SGO_RS09675 | <i>BS16</i> | 30S ribosomal protein                                |
| SGO_RS09680 | <i>rpmC</i> | ribosomal protein L29                                |
| SGO_RS09685 | <i>rplP</i> | ribosomal protein L16                                |
| SGO_RS09690 | <i>rpsC</i> | ribosomal protein S3                                 |
| SGO_RS09695 | <i>rplV</i> | ribosomal protein L22                                |
| SGO_RS09855 |             | possible polysaccharide transport protein            |
| SGO_RS09860 |             | nucleotide sugar dehydratase, putative               |
| SGO_RS09865 |             | nucleotidyl transferase, putative                    |
| SGO_RS09870 |             | extracellular polysaccharide polymerase putative     |
| SGO_RS09875 | <i>licD</i> | licD3 protein                                        |
| SGO_RS09880 |             | glycosyltransferase                                  |
| SGO_RS09885 |             | extracellular polysaccharide glycosyltransferase     |
| SGO_RS09890 |             | UDP-glucose 4-epimerase BH3715                       |
| SGO_RS09895 |             | galactosyltransferase                                |
| SGO_RS09900 |             | extracellular polysaccharide biosynthesis            |
| SGO_RS09905 | <i>wze</i>  | putative autophosphorylating protein tyrosine kinase |
| SGO_RS09910 | <i>wzd</i>  | polysaccharide export protein, MPA1 family           |
| SGO_RS09915 | <i>wzh</i>  | wzh/Putative phosphotyrosine-protein phosphatase     |
| SGO_RS09920 | <i>wzg</i>  | transcriptional regulator                            |
| SGO_RS10090 | <i>rpmF</i> | ribosomal protein L32                                |
| SGO_RS10095 | <i>rpmG</i> | ribosomal protein L33                                |
| SGO_RS10265 | <i>rpsD</i> | ribosomal protein S4                                 |
| SGO_RS10300 | <i>abpA</i> | amylase-binding protein AbpA                         |
| SGO_RS10315 |             | hypothetical protein                                 |
| SGO_RS10320 | <i>mreC</i> | cell shape-determining protein MreC                  |
| SGO_RS10325 |             | tRNA-Ser                                             |
| SGO_RS10350 |             | tRNA-Ser                                             |
| SGO_RS10355 |             | tRNA-Met                                             |
| SGO_RS10360 |             | tRNA-Met                                             |
| SGO_RS10435 |             | tRNA-Asn                                             |
| SGO_RS10500 | <i>comE</i> | competence response regulator ComE                   |
| SGO_RS10510 | <i>comC</i> | competence factor-related protein ComC               |
| SGO_RS10610 |             | hypothetical protein                                 |
| SGO_RS10700 |             | hypothetical protein                                 |
| SGO_RS10795 | <i>rpmJ</i> | ribosomal protein L36                                |

---

Glc\_GlcN (2)

---

|                         |               |                                                               |
|-------------------------|---------------|---------------------------------------------------------------|
| SGO_RS03070             |               | tRNA-Pro                                                      |
| SGO_RS09530             |               | tRNA-Phe                                                      |
| Glc_GlcN_GlcN<br>Ac (2) |               |                                                               |
| SGO_RS09525             |               | tRNA-Tyr                                                      |
| SGO_RS10225             |               | conserved hypothetical protein                                |
| GlcN_GlcNAc<br>(4)      |               |                                                               |
| SGO_RS08830             | <i>troB</i>   | manganese ABC transporter, ATP-binding protein SP1648         |
| SGO_RS08835             | <i>scaA</i>   | ABC transporter, manganese transport                          |
| SGO_RS08840             |               | metal ABC transporter substrate-binding lipoprotein precursor |
| SGO_RS09640             | <i>rplR</i>   | ribosomal protein L18                                         |
| GlcN (101)              |               |                                                               |
| SGO_RS00105             |               | conserved domain protein                                      |
| SGO_RS00165             | <i>purC</i>   | phosphoribosylaminoimidazole-succinocarboxamide synthase      |
| SGO_RS00170             |               | phosphoribosylformylglycinamide synthase                      |
| SGO_RS00175             | <i>purF</i>   | amidophosphoribosyltransferase                                |
| SGO_RS00180             | <i>purM</i>   | phosphoribosylformylglycinamide cyclo-ligase                  |
| SGO_RS00185             | <i>purN</i>   | phosphoribosylglycinamide formyltransferase                   |
| SGO_RS00205             |               | beta-galactosidase                                            |
| SGO_RS00210             |               | PTS system, IIB component                                     |
| SGO_RS00215             |               | PTS system, IIC component                                     |
| SGO_RS00220             |               | PTS system, IID component                                     |
| SGO_RS00225             |               | PTS system, IIA component                                     |
| SGO_RS00230             |               | tagatose-6-phosphate ketose/aldose isomerase                  |
| SGO_RS00490             |               | ribonucleotide reductase-like protein                         |
| SGO_RS00525             | <i>malQ</i>   | 4-alpha-glucanotransferase                                    |
| SGO_RS00530             | <i>glgP-2</i> | maltodextrin phosphorylase                                    |
| SGO_RS00800             | <i>abpB</i>   | amylase-binding protein B                                     |
| SGO_RS01240             |               | CAAX amino terminal protease family                           |
| SGO_RS01315             |               | amino acid permease family protein                            |
| SGO_RS01370             | <i>msrA</i>   | peptide methionine sulfoxide reductase msrA/msrB              |
| SGO_RS01425             |               | COPAB ATPases metal-fist type repressor                       |
| SGO_RS01430             |               | copper -translocating P-type ATPase                           |
| SGO_RS01435             |               | copper-translocating P-type ATPase                            |
| SGO_RS01480             |               | membrane protein, putative                                    |
| SGO_RS01485             |               | ABC transporter ATP-binding protein-like protein              |
| SGO_RS01490             |               | membrane protein, putative                                    |
| SGO_RS01495             |               | ABC transporter ATP-binding protein-like protein              |
| SGO_RS01570             |               | conserved hypothetical protein                                |
| SGO_RS01740             |               | ABC transporter, ATP-binding protein SP1580                   |
| SGO_RS01750             |               | membrane spanning protein                                     |

---

|             |               |                                                               |
|-------------|---------------|---------------------------------------------------------------|
| SGO_RS01920 |               | exo-beta-D-fructosidase                                       |
| SGO_RS01925 |               | multidrug-efflux transporter 2 regulator                      |
| SGO_RS01930 |               | conserved hypothetical protein                                |
| SGO_RS01935 |               | LPXTG cell wall surface protein, zinc carboxypeptidase family |
| SGO_RS02000 | <i>grpE</i>   | co-chaperone GrpE                                             |
| SGO_RS02005 | <i>dnaK</i>   | DnaK chaperone protein                                        |
| SGO_RS02020 |               | beta-N-acetylhexosaminidase precursor                         |
| SGO_RS02045 |               | integral membrane protein                                     |
| SGO_RS02050 |               | conserved hypothetical protein TIGR01440                      |
| SGO_RS02360 |               | cell wall binding protein                                     |
| SGO_RS02365 |               | cell wall binding protein                                     |
| SGO_RS02395 |               | sensor histidine kinase                                       |
| SGO_RS02455 | <i>rgg</i>    | transcriptional regulator Rgg                                 |
| SGO_RS02465 | <i>dsg</i>    | putative permease                                             |
| SGO_RS02785 | <i>adhA</i>   | alcohol dehydrogenase                                         |
| SGO_RS03115 |               | conserved hypothetical protein                                |
| SGO_RS03175 |               | conserved hypothetical protein                                |
| SGO_RS03185 |               | ImpB/MucB/SamB family protein                                 |
| SGO_RS03190 |               | putative transcriptional repressor                            |
| SGO_RS03360 |               | transcription regulator                                       |
| SGO_RS03380 |               | Transcriptional regulator, DeoR family                        |
| SGO_RS03975 | <i>ppdK</i>   | pyruvate, phosphate dikinase                                  |
| SGO_RS04075 | <i>uvrC</i>   | excinuclease ABC, C subunit                                   |
| SGO_RS04135 |               | carboxypeptidase                                              |
| SGO_RS04725 |               | integral membrane protein                                     |
| SGO_RS05455 | <i>fruR</i>   | phosphotransferase system repressor                           |
| SGO_RS05535 |               | Tyrosine recombinase xerC                                     |
| SGO_RS05615 |               | hypothetical protein                                          |
| SGO_RS05690 |               | 4-oxalocrotonate tautomerase -related protein                 |
| SGO_RS05815 |               | LPXTG cell wall surface protein                               |
| SGO_RS06175 |               | probable transcriptional regulator (LysR family)              |
| SGO_RS06460 |               | hypothetical protein                                          |
| SGO_RS06800 | <i>sufB-2</i> | FeS assembly protein SufB                                     |
| SGO_RS07075 |               | Ser/Thr protein phosphatase family                            |
| SGO_RS07290 |               | beta-galactosidase                                            |
| SGO_RS07300 |               | putative methyltransferase                                    |
| SGO_RS07400 |               | LacX protein, aldolase 1 epimerase                            |
| SGO_RS07410 | <i>lacG</i>   | 6-phospho-beta-galactosidase                                  |
| SGO_RS07415 | <i>lacE</i>   | PTS system, lactose-specific IIBC component                   |
| SGO_RS07420 | <i>lacF</i>   | PTS system, lactose-specific IIa component                    |
| SGO_RS07425 |               | antiterminator protein                                        |

---

|                 |               |                                                       |
|-----------------|---------------|-------------------------------------------------------|
| SGO_RS07430     | <i>lacD-2</i> | tagatose 1,6-diphosphate aldolase                     |
| SGO_RS07435     | <i>lacC</i>   | tagatose-6-phosphate kinase                           |
| SGO_RS07445     | <i>lacA-1</i> | galactose-6-phosphate isomerase, LacA subunit         |
| SGO_RS07465     | <i>lacD-1</i> | tagatose 1,6-diphosphate aldolase                     |
| SGO_RS07475     | <i>lacB-1</i> | galactose-6-phosphate isomerase, LacB subunit         |
| SGO_RS07480     | <i>lacA-2</i> | galactose-6-phosphate isomerase, LacA subunit         |
| SGO_RS07600     | <i>glgA</i>   | glycogen synthase                                     |
| SGO_RS07605     | <i>glgD</i>   | glucose-1-phosphate adenylyltransferase, GlgD subunit |
| SGO_RS07610     | <i>glgC</i>   | glucose-1-phosphate adenylyltransferase               |
| SGO_RS07755     |               | hypothetical protein                                  |
| SGO_RS08520     |               | conserved hypothetical protein                        |
| SGO_RS08525     |               | LytTr DNA-binding domain family                       |
| SGO_RS08645     |               | ABC transporter, substrate-binding protein SP0092     |
| SGO_RS08855     | <i>hutU</i>   | urocanate hydratase                                   |
| SGO_RS08865     |               | serine cycle enzyme, putative                         |
| SGO_RS08925     |               | CAAX amino terminal protease family                   |
| SGO_RS08930     |               | conserved hypothetical protein                        |
| SGO_RS09090     |               | ATP-dependent proteinase ATP-binding chain            |
| SGO_RS09230     | <i>groL</i>   | 60 kDa chaperonin/groEL protein                       |
| SGO_RS09235     | <i>groES</i>  | chaperonin, 10 kDa                                    |
| SGO_RS09250     |               | conserved hypothetical protein                        |
| SGO_RS09255     |               | PTS system, fructose(mannose)-specific IID            |
| SGO_RS09260     |               | PTS system, IIC component                             |
| SGO_RS09265     |               | PTS system, fructose(mannose)-specific IIB            |
| SGO_RS09270     |               | PTS system, fructose(mannose)-specific IIA component  |
| SGO_RS09460     |               | conserved hypothetical protein                        |
| SGO_RS09465     |               | copper transport protein CopZ-related protein         |
| SGO_RS09470     |               | copper-translocating P-type ATPase                    |
| SGO_RS09475     |               | negative transcriptional regulator, CopY              |
| SGO_RS09785     |               | hypothetical protein                                  |
| SGO_RS10100     |               | putative multidrug efflux associated                  |
| Glc_GlcN (2)    |               |                                                       |
| SGO_RS00565     | <i>acdH</i>   | alcohol-acetaldehyde dehydrogenase                    |
| SGO_RS03180     |               | conserved hypothetical protein                        |
| GlcN_GlcNAc (4) |               |                                                       |
| SGO_RS07440     | <i>lacB-2</i> | galactose-6-phosphate isomerase, LacB subunit         |
| SGO_RS07470     | <i>lacC-2</i> | tagatose-6-phosphate kinase                           |
| SGO_RS08095     |               | intracellular glycosyl hydrolase                      |
| SGO_RS08100     |               | trehalose PTS enzyme II                               |

**Table S7.** DEG identified in *S. mutans* UA159 and *S. gordonii* DL1 when co-cultured on GlcNAc, in comparison to UA159 and DL1, respectively, growing alone on GlcNAc. Gene# in red indicates up-regulation, and Gene# in blue indicates down-regulation.

| Gene#               | Gene name        | Function                                                        |
|---------------------|------------------|-----------------------------------------------------------------|
| UA159               |                  |                                                                 |
| Glc_GlcN_GlcNAc (5) |                  |                                                                 |
| SMU_182             | <i>sloA</i>      | ABC transporter, ATP-binding protein, iron and/or manganese     |
| SMU_183             | <i>sloB</i>      | manganese ABC transporter permease element                      |
| SMU_184             | <i>fimA lral</i> | ABC transporter element, iron predicted binding protein         |
| SMU_185             |                  | hypothetical protein                                            |
| SMU_186             | <i>sloR</i>      | metalloregulatory protein (27, 28)                              |
| Glc_GlcNAc (1)      |                  |                                                                 |
| SMU_770c            | <i>mntH hitA</i> | putative manganese transporter                                  |
| Glc_GlcN_GlcNAc (8) |                  |                                                                 |
| SMU_1906c           | <i>bsmB</i>      | bacteriocin-related protein                                     |
| SMU_1914c           | <i>nImC cipB</i> | mutacin V                                                       |
| SMU_196c            |                  | immunogenic secreted protein (transfer protein)                 |
| SMU_200c            |                  | hypothetical protein                                            |
| SMU_201c            |                  | conserved hypothetical protein                                  |
| SMU_202c            |                  | conserved hypothetical protein/Streptococcus-specific protein   |
| SMU_205c            |                  | conserved hypothetical protein                                  |
| SMU_206c            |                  | hypothetical protein                                            |
| GlcNAc (5)          |                  |                                                                 |
| SMU_1927            | <i>psaA</i>      | PsaA protein/ ABC transporter, ATP-binding protein              |
| SMU_1928            | <i>psaB</i>      | protein secretion ABC transport permease                        |
| SMU_2133c           |                  | conserved hypothetical protein (possible transmembrane protein) |
| SMU_213c            |                  | hypothetical protein                                            |
| SMU_215c            |                  | hypothetical protein                                            |
| Glc_GlcNAc (13)     |                  |                                                                 |
| SMU_150             | <i>nImA</i>      | non-lantibiotic mutacin IV A                                    |
| SMU_151             | <i>nImB</i>      | non-lantibiotic mutacin IV B                                    |
| SMU_153             |                  | hypothetical protein                                            |
| SMU_1902c           | <i>bsmK</i>      | hypothetical protein                                            |
| SMU_1903c           |                  | hypothetical protein                                            |
| SMU_1904c           |                  | hypothetical protein                                            |

|                     |             |                                                               |
|---------------------|-------------|---------------------------------------------------------------|
| SMU_1905c           | <i>bsmL</i> | hypothetical protein                                          |
| SMU_1908c           |             | hypothetical protein                                          |
| SMU_1909c           |             | putative mutacin immunity protein                             |
| SMU_1910c           |             | hypothetical protein                                          |
| SMU_1912c           |             | hypothetical protein                                          |
| SMU_1913c           | <i>bplI</i> | hypothetical protein; immunity protein, BLpL-like             |
| SMU_423             | <i>nImD</i> | mutacin VI                                                    |
| <hr/>               |             |                                                               |
| GlcN_GlcNAc<br>(18) |             |                                                               |
| SMU_1674            | <i>patB</i> | aminotransferase class II                                     |
| SMU_1675            | <i>metB</i> | cystathionine gamma-synthase                                  |
| SMU_191c            |             | phage-related integrase                                       |
| SMU_193c            |             | conserved hypothetical protein                                |
| SMU_195c            |             | hypothetical protein                                          |
| SMU_197c            |             | hypothetical protein                                          |
| SMU_198c            | <i>tpn</i>  | conjugative transposon protein                                |
| SMU_199c            |             | hypothetical protein                                          |
| SMU_204c            |             | hypothetical protein                                          |
| SMU_207c            |             | transcriptional regulator                                     |
| SMU_208c            |             | conserved hypothetical protein, FtsK/SpoIIIE family           |
| SMU_209c            |             | hypothetical protein                                          |
| SMU_210c            |             | hypothetical protein                                          |
| SMU_211c            |             | hypothetical protein                                          |
| SMU_214c            |             | hypothetical protein                                          |
| SMU_216c            |             | hypothetical protein                                          |
| SMU_496             | <i>cysK</i> | cysteine synthetase A                                         |
| SMU_574c            | <i>lrgB</i> | effector of murein hydrolase                                  |
| <hr/>               |             |                                                               |
| DL1                 |             |                                                               |
| Glc_GlcN_GlcNAc (2) |             |                                                               |
| SGO_RS09525         |             | tRNA-Tyr                                                      |
| SGO_RS10225         |             | conserved hypothetical protein                                |
| <hr/>               |             |                                                               |
| GlcN_GlcNAc (4)     |             |                                                               |
| SGO_RS08830         | <i>troB</i> | manganese ABC transporter, ATP-binding protein SP1648         |
| SGO_RS08835         | <i>scaA</i> | ABC transporter, manganese transport                          |
| SGO_RS08840         |             | metal ABC transporter substrate-binding lipoprotein precursor |
| SGO_RS09640         | <i>rplR</i> | ribosomal protein L18                                         |
| <hr/>               |             |                                                               |
| GlcNAc (1)          |             |                                                               |
| SGO_RS01860         |             | hypothetical protein                                          |
| <hr/>               |             |                                                               |
| GlcN_GlcNAc (4)     |             |                                                               |
| <hr/>               |             |                                                               |



---

|             |               |                                               |
|-------------|---------------|-----------------------------------------------|
| SGO_RS07440 | <i>lacB-2</i> | galactose-6-phosphate isomerase, LacB subunit |
| SGO_RS07470 | <i>lacC-2</i> | tagatose-6-phosphate kinase                   |
| SGO_RS08095 |               | intracellular glycosyl hydrolase              |
| SGO_RS08100 |               | trehalose PTS enzyme II                       |

---

**Table S8.** Primers used in this study for RT-qPCR.

| Primers     | Sequence                    |
|-------------|-----------------------------|
| SMU.641-AS  | TTG ACT GTC TTT CGG TGC TG  |
| SMU.641-S   | ATC CTG ATG GTT TCG ACC AC  |
| SMU.638-AS  | TCA GCT GCT TAC CTG ACA CG  |
| SMU.638-S   | AAA GTT CAT TCG CAG CCA AC  |
| SMU.770c-AS | TCC CGG ATC CAT ATA ACC AA  |
| SMU.770c-S  | CAA TCA CTC AGC GAG GTC AA  |
| SMU.127-AS  | GCA TAG AAC CAC CAC GAC CT  |
| SMU.127-S   | TTT TCA AAT CAC CGT GGA CA  |
| SMU.930c-AS | CAT CAT CTG TTA GGC GAG CA  |
| SMU.930c-S  | CAC ACA GCC CAA TCT TTC CT  |
| SMU.932-AS  | ACC TGA GCC GGA TAA TCC TT  |
| SMU.932-S   | AGC TCA GCA AGC TCA AGG TC  |
| SMU.936-AS  | CGC GTC CTG TCT TCT TTA GG  |
| SMU.936-S   | AGA TGT GGC CAA TCA TGT CA  |
| SMU.1346-AS | TCT GGG AAT ATC CCA CCT TG  |
| SMU.1346-S  | CCA GGT ATC CCT CCC AAT TT  |
| SMU.1424-AS | GCC AAC AAT AAC AGC CCC TA  |
| SMU.1424-S  | CAT CAA CAG AGA CGC AAG GA  |
| Sm_lrgA-AS  | TGC CTG ATG GGA CAA ACA TA  |
| Sm_lrgA-S   | TGT CCT TTT GTG CAG CCA TA  |
| Sm_sloA-AS  | ACG AGC CAA GAG CAT ACG TT  |
| Sm_sloA-S   | TGG CAA TGT GTT CAA GAA GC  |
| Sm_lacA-S   | TAT GAC ACG CGG CCA TAA TA  |
| Sm_lacA-AS  | CGC CGT CAT ATT TAG CCT CTA |
| Sm_gyrA-S   | CCA AGA ATC TGC TGT CCG     |
| Sm_gyrA-AS  | TTG CGA CTA TCT GCT ATG TG  |

---

|              |                                   |
|--------------|-----------------------------------|
| Sm_lytS-S    | AGC TGC GCT TTC CTG ATA AA        |
| Sm_lytS-AS   | ATG ACG CAC TGC ATT TTC AA        |
| Sm_nlmA-S    | AAT GGA CAG CCA AAC ACT TTC       |
| Sm_nlmA-AS   | TAA CAA GAG TCG CAC CTG CC        |
| Sm_nlmB-S    | TGT CAG AAG TTT TTG GTG G         |
| Sm_nlmB-AS   | ACT CCA GCA CAT CCA GCA AG        |
| Sm_nlmD-S    | CAA CTG TTG AGG GTG GTG GTA TG    |
| Sm_nlmD-AS   | AAG CCG CTC CAG ATA CTG TAC C     |
| Sm_glgD-S    | GCT ATC GGA TTC CCA GAA ATG G     |
| Sm_glgD-AS   | CAC GAC CGC TTC TGA TAT GAT C     |
| Sm_pfl-S     | AAG GAA CTG ACT GGA AAG AC        |
| Sm_pfl-AS    | CGT GTT TCT TCG TAA TGC G         |
| Sm_cipB-S    | TTG TGC AGC AGG TAT TGC TC        |
| Sm_cipB-AS   | AAA GGC ACC AGT GCC AAT AG        |
| Sgo_lpdA-AS  | TGC GTC TGA AGC AAT AGC AC        |
| Sgo_lpdA-S   | GCA GCA GTT GGT TTG ACA GA        |
| Sg_endoD-AS  | CGG GTT TGG TGA TAG CTG TT        |
| Sg_endoD-S   | TTC TGG ACA GGT TTC CAA GG        |
| Sg_troB-AS   | CAA TCA AGA CCC GTT GGA AT        |
| Sg_troB-S    | ACT GGG ACA AGG TCA ACC AG        |
| Sg_lrgA-AS   | CTG CAC GGT ATA GGC AAT GA        |
| Sg_lrgA-S    | CCG GCA GCA GTT GGT ATT AT        |
| SGO_1133-AS  | CAC CGA GGT TAC CAG CAT CT        |
| SGO_1133-S   | TCA ATG GAA TGA TGG CTG AA        |
| SGO_gyrA-S   | GTT GGT GCA GGT GTT GTG TC        |
| SGO_gyrA-AS  | GGC CTT TTG TCG GAT ATT CA        |
| SGO_lacA1-S  | GGT CAG GAT TTT GTT GAT GTG ACC C |
| SGO_lacA1-AS | GGA CCA GCC CCA TAA GCA TCG AT    |
| SGO_lacA2-S  | GGT GCA GAT GCT GCT GGA AAT       |

---

---

|              |                               |
|--------------|-------------------------------|
| SGO_lacA2-AS | CAC CTC AGC TGC AAC TGC CAA T |
| SGO_bgaA-S   | CGT CGT CTC AAG CAA ATG AA    |
| SGO_bgaA-AS  | TCC TAA CTC TGC CGC AAT CT    |
| SGO_bgaC-S   | GGC AGA GCC TGT TCA AAG TC    |
| SGO_bgaC-AS  | ATC TGC ATC CCA GTC AGC TT    |
| SGO_arcA-S   | CGC TCC AGG TGT TGT TGT TGT G |
| SGO_arcA-AS  | GAC CGC GAA CCA ATT CAC TTC C |
| SGO_NAgA-S   | AGC GCA AAA TCC TTC CTA CA    |
| SGO_NAgA-AS  | ATT CAG CAA GCC ATT TGA GG    |
| SGO_spxB-S   | AAT CCT TGG TGA TGC AGG TC    |
| SGO_spxB-AS  | CGC CAG TTT TGG TTG TTC TT    |

---

### Reference

1. Huang X, Palmer SR, Ahn SJ, Richards VP, Williams ML, Nascimento MM, Burne RA. 2016. A highly arginolytic *Streptococcus* species that potently antagonizes *Streptococcus mutans*. *Appl Environ Microbiol* 82:2187-2201.
